# Supplementary material for: Time trends in tuberculosis mortality across the BRICS: an age-period-cohort analysis for the GBD 2019
Source: PubMed Central journal article supplement — eClinicalMedicine. 2022 Sep 17;53:101646. doi: 10.1016/j.eclinm.2022.101646 (PMC9486016; doi:10.1016/j.eclinm.2022.101646), 2022-09-17
Supplement: mmc1.pdf [file mmc1.pdf]

# Supplementary appendix

## Content

|                                                                                                                                                                               |    |
|-------------------------------------------------------------------------------------------------------------------------------------------------------------------------------|----|
| Appendix 1.1 Age-standardized mortality rates across BRICS and High-income Asia Pacific countries from 1990 and 2019 in HIV-negative populations .....                        | 2  |
| Appendix 1.2 Total number of deaths resulting from tuberculosis across BRICS and High-income Asia Pacific countries from 1990 and 2019 in HIV-negative populations .....      | 3  |
| Appendix 1.3 Relative proportion of tuberculosis to all death causes across BRICS and High-income Asia Pacific countries from 1990 and 2019 in HIV-negative populations ..... | 4  |
| Appendix 1.4 Age-standardized mortality rates across BRICS and High-income Asia Pacific countries from 1990 and 2019 in HIV-positive populations .....                        | 5  |
| Appendix 1.5 Total number of deaths resulting from tuberculosis across BRICS and High-income Asia Pacific countries from 1990 and 2019 in HIV-positive populations .....      | 6  |
| Appendix 1.6 Relative proportion of tuberculosis to all death causes across BRICS and High-income Asia Pacific countries from 1990 and 2019 in HIV-positive populations ..... | 7  |
| Appendix 2.1 Annual percentage change for tuberculosis mortality overall and in each age group across BRICS from 1990 and 2019 in HIV-negative populations .....              | 8  |
| Appendix 2.2 Annual percentage change for tuberculosis mortality overall and in each age group across BRICS from 1990 and 2019 in HIV-negative Male .....                     | 9  |
| Appendix 2.3 Annual percentage change for tuberculosis mortality overall and in each age group across BRICS from 1990 and 2019 in HIV-negative Female .....                   | 10 |
| Appendix 2.4 Annual percentage change for tuberculosis mortality overall and in each age group across BRICS from 1990 and 2019 in HIV-positive populations .....              | 11 |
| Appendix 2.5 Annual percentage change for tuberculosis mortality overall and in each age group across BRICS from 1990 and 2019 in HIV-positive Male .....                     | 12 |
| Appendix 2.6 Annual percentage change for tuberculosis mortality overall and in each age group across BRICS from 1990 and 2019 in HIV-positive Female .....                   | 13 |
| Appendix 3.1 Fitted longitudinal age effects of tuberculosis mortality (per 100 000 person-years) and the corresponding 95% CIs in HIV-negative populations .....             | 14 |
| Appendix 3.2 Fitted longitudinal age effects of tuberculosis mortality (per 100 000 person-years) and the corresponding 95% CIs in HIV-negative Male .....                    | 14 |
| Appendix 3.3 Fitted longitudinal age effects of tuberculosis mortality (per 100 000 person-years) and the corresponding 95% CIs in HIV-negative Female .....                  | 15 |
| Appendix 3.4 Relative risk of each period compared with the reference (2000–2004) and the corresponding 95% CIs in HIV-negative populations .....                             | 16 |
| Appendix 3.5 Relative risk of each cohort compared with the reference (cohort 1955–1959) and the corresponding 95% CIs in HIV-negative populations .....                      | 17 |

|                                                                                                                                                                   |    |
|-------------------------------------------------------------------------------------------------------------------------------------------------------------------|----|
| Appendix 3.6 Relative risk of each cohort compared with the reference (cohort 1955–1959) and the corresponding 95% CIs in HIV-negative Male .....                 | 18 |
| Appendix 3.7 Relative risk of each cohort compared with the reference (cohort 1955–1959) and the corresponding 95% CIs in HIV-negative Female.....                | 19 |
| Appendix 4.1 Fitted longitudinal age effects of tuberculosis mortality (per 100 000 person-years) and the corresponding 95% CIs in HIV-positive populations ..... | 20 |
| Appendix 4.2 Fitted longitudinal age effects of tuberculosis mortality (per 100 000 person-years) and the corresponding 95% CIs in HIV-positive Male .....        | 20 |
| Appendix 4.3 Fitted longitudinal age effects of tuberculosis mortality (per 100 000 person-years) and the corresponding 95% CIs in HIV-positive Female.....       | 21 |
| Appendix 4.4 Relative risk of each period compared with the reference (2000–2004) and the corresponding 95% CIs in HIV-positive populations.....                  | 22 |
| Appendix 4.5 Relative risk of each cohort compared with the reference (cohort 1955–1959) and the corresponding 95% CIs in HIV-positive populations.....           | 23 |
| Appendix 4.6 Relative risk of each cohort compared with the reference (cohort 1955–1959) and the corresponding 95% CIs in HIV- positive Male .....                | 24 |
| Appendix 4.7 Relative risk of each cohort compared with the reference (cohort 1955–1959) and the corresponding 95% CIs in HIV- positive Female .....              | 25 |
| GATHER checklist.....                                                                                                                                             | 26 |
| Authors' Contributions.....                                                                                                                                       | 27 |

The data presented in the Figures 1-4 was included in the appendix.

The Appendix 1.1-1.6 showed all data in Figure 1, including the age-standardized mortality rates (ASMRs), total number of deaths resulting from tuberculosis (TB), and relative proportion of tuberculosis to all death causes across Brazil, Russia, India, China, and South Africa between 1990 and 2019 in HIV-negative populations and HIV-positive populations.

The Appendix 2.1-2.6 showed all data in Figure 2, including local drift with net drift values for tuberculosis (TB) mortality and sex difference in Brazil, Russia, India, China, and South Africa from 1990 and 2019 in HIV-negative populations and HIV-positive populations.

The Appendix 3.1-3.7 showed all data in Figure 3, including parameter estimates of age, period, and cohort effects on HIV-negative tuberculosis (TB) mortality rate and sex difference in Brazil, Russia, India, China, and South Africa from 1990 to 2019.

The Appendix 4.1-4.7 showed all data in Figure 4, including parameter estimates of age, period, and cohort effects on HIV-negative tuberculosis (TB) mortality rate and sex difference in Brazil, Russia, India, China, and South Africa from 1990 to 2019.

The Appendix 5 listed all authors in the study group.

Appendix 1.1 Age-standardized mortality rates across BRICS and High-income Asia Pacific countries from 1990 and 2019 in HIV-negative populations

| Year | China | Russia | India | Brazil | South Africa | BRICS | High-income Asia Pacific |
|------|-------|--------|-------|--------|--------------|-------|--------------------------|
| 1990 | 20.2  | 5.9    | 121.7 | 9.1    | 68.7         | 55.9  | 6.9                      |
| 1991 | 19.0  | 6.1    | 123.5 | 8.5    | 67.0         | 56.1  | 6.3                      |
| 1992 | 17.9  | 7.0    | 124.6 | 8.2    | 68.1         | 56.2  | 5.8                      |
| 1993 | 16.5  | 9.6    | 116.0 | 8.0    | 62.4         | 52.6  | 5.4                      |
| 1994 | 15.3  | 12.0   | 108.4 | 7.7    | 63.7         | 49.6  | 5.1                      |
| 1995 | 14.2  | 11.9   | 103.2 | 7.4    | 63.0         | 47.3  | 4.8                      |
| 1996 | 12.9  | 11.2   | 100.0 | 7.1    | 65.0         | 45.7  | 4.5                      |
| 1997 | 11.8  | 10.5   | 100.8 | 6.8    | 73.1         | 45.7  | 4.3                      |
| 1998 | 11.0  | 10.5   | 98.6  | 6.5    | 80.3         | 44.9  | 4.1                      |
| 1999 | 10.5  | 12.1   | 95.2  | 6.3    | 79.6         | 43.6  | 4.0                      |
| 2000 | 10.2  | 13.3   | 91.8  | 5.9    | 84.3         | 42.5  | 3.7                      |
| 2001 | 9.5   | 13.8   | 87.0  | 5.6    | 83.6         | 40.6  | 3.4                      |
| 2002 | 9.0   | 14.4   | 81.9  | 5.3    | 87.6         | 38.6  | 3.2                      |
| 2003 | 8.2   | 14.9   | 76.5  | 5.0    | 92.4         | 36.5  | 2.9                      |
| 2004 | 7.6   | 14.4   | 69.3  | 4.7    | 94.2         | 33.5  | 2.7                      |
| 2005 | 6.8   | 15.3   | 66.8  | 4.4    | 95.2         | 32.4  | 2.6                      |
| 2006 | 5.9   | 13.3   | 63.7  | 4.1    | 96.1         | 30.8  | 2.4                      |
| 2007 | 5.1   | 11.8   | 61.5  | 3.9    | 90.4         | 29.5  | 2.2                      |
| 2008 | 4.6   | 11.1   | 59.6  | 3.7    | 85.2         | 28.6  | 2.1                      |
| 2009 | 4.1   | 9.8    | 55.0  | 3.6    | 80.2         | 26.5  | 1.9                      |
| 2010 | 3.8   | 9.4    | 51.0  | 3.4    | 75.0         | 24.7  | 1.8                      |
| 2011 | 3.5   | 8.3    | 48.5  | 3.2    | 67.6         | 23.4  | 1.8                      |
| 2012 | 3.2   | 7.5    | 47.8  | 3.0    | 61.7         | 23.0  | 1.7                      |
| 2013 | 3.0   | 6.7    | 47.7  | 2.9    | 57.0         | 22.8  | 1.6                      |
| 2014 | 2.7   | 6.3    | 46.4  | 2.8    | 54.2         | 22.2  | 1.5                      |
| 2015 | 2.6   | 5.5    | 43.1  | 2.7    | 51.5         | 20.7  | 1.4                      |
| 2016 | 2.5   | 4.9    | 41.1  | 2.7    | 48.0         | 19.8  | 1.3                      |
| 2017 | 2.3   | 4.3    | 39.9  | 2.5    | 45.4         | 19.2  | 1.3                      |
| 2018 | 2.1   | 4.2    | 38.2  | 2.4    | 42.1         | 18.4  | 1.3                      |
| 2019 | 2.0   | 4.1    | 36.1  | 2.3    | 40.1         | 17.4  | 1.3                      |

Appendix 1.2 Total number of deaths resulting from tuberculosis across BRICS and High-income Asia Pacific countries from 1990 and 2019 in HIV-negative populations

| Year | China | Russia | India | Brazil | South Africa | BRICS | High-income Asia Pacific |
|------|-------|--------|-------|--------|--------------|-------|--------------------------|
| 1990 | 177.5 | 10.4   | 614.0 | 10.0   | 19.5         | 831.3 | 13.1                     |
| 1991 | 169.9 | 10.6   | 637.3 | 9.6    | 19.3         | 846.7 | 12.5                     |
| 1992 | 163.2 | 12.2   | 657.5 | 9.3    | 20.1         | 862.4 | 11.8                     |
| 1993 | 152.9 | 16.8   | 625.7 | 9.4    | 18.6         | 823.4 | 11.3                     |
| 1994 | 145.3 | 21.1   | 601.1 | 9.2    | 19.2         | 795.9 | 11.0                     |
| 1995 | 137.6 | 20.9   | 587.4 | 9.1    | 19.1         | 774.1 | 10.8                     |
| 1996 | 127.5 | 19.6   | 584.5 | 8.9    | 19.7         | 760.3 | 10.5                     |
| 1997 | 119.1 | 18.5   | 603.9 | 8.8    | 22.6         | 772.9 | 10.3                     |
| 1998 | 114.3 | 18.5   | 605.2 | 8.7    | 25.6         | 772.3 | 10.3                     |
| 1999 | 111.8 | 21.5   | 602.7 | 8.6    | 26.2         | 770.8 | 10.2                     |
| 2000 | 111.0 | 23.9   | 595.7 | 8.3    | 28.9         | 767.7 | 10.0                     |
| 2001 | 106.3 | 24.9   | 577.2 | 8.1    | 29.5         | 746.1 | 9.5                      |
| 2002 | 102.3 | 26.3   | 556.5 | 7.9    | 32.0         | 725.0 | 9.0                      |
| 2003 | 96.3  | 27.2   | 534.0 | 7.6    | 34.9         | 700.0 | 8.7                      |
| 2004 | 91.1  | 26.6   | 501.8 | 7.4    | 36.5         | 663.4 | 8.4                      |
| 2005 | 83.9  | 28.2   | 498.9 | 7.0    | 37.5         | 655.5 | 8.3                      |
| 2006 | 74.4  | 24.6   | 491.8 | 6.8    | 38.4         | 636.0 | 8.1                      |
| 2007 | 66.5  | 21.9   | 490.8 | 6.7    | 36.5         | 622.4 | 7.8                      |
| 2008 | 61.3  | 20.8   | 492.3 | 6.6    | 34.8         | 615.8 | 7.5                      |
| 2009 | 57.0  | 18.4   | 474.5 | 6.5    | 33.0         | 589.4 | 7.2                      |
| 2010 | 53.3  | 17.7   | 459.9 | 6.3    | 31.0         | 568.3 | 7.1                      |
| 2011 | 50.5  | 15.6   | 453.4 | 6.2    | 28.1         | 553.8 | 7.1                      |
| 2012 | 48.3  | 14.2   | 461.6 | 6.0    | 26.0         | 556.1 | 7.0                      |
| 2013 | 46.1  | 12.8   | 466.7 | 6.0    | 24.3         | 555.9 | 6.8                      |
| 2014 | 43.4  | 12.0   | 462.6 | 5.9    | 23.5         | 547.4 | 6.6                      |
| 2015 | 42.0  | 10.6   | 445.8 | 5.8    | 22.7         | 526.9 | 6.5                      |
| 2016 | 42.1  | 9.5    | 440.2 | 5.8    | 21.5         | 519.2 | 6.6                      |
| 2017 | 39.6  | 8.4    | 440.9 | 5.7    | 20.9         | 515.4 | 6.7                      |
| 2018 | 37.6  | 8.1    | 434.2 | 5.6    | 20.1         | 505.6 | 6.9                      |
| 2019 | 36.6  | 8.0    | 422.6 | 5.5    | 19.8         | 492.5 | 7.1                      |

Appendix 1.3 Relative proportion of tuberculosis to all death causes across BRICS and High-income Asia Pacific countries from 1990 and 2019 in HIV-negative populations

| Year | China | Russia<br>Federation | India | Brazil | South Africa | BRICS | High-income<br>Asia Pacific |
|------|-------|----------------------|-------|--------|--------------|-------|-----------------------------|
| 1990 | 13.1  | 17.1                 | 13.4  | 3.9    | 16.7         | 13.1  | 13.9                        |
| 1991 | 12.9  | 17.6                 | 13.9  | 3.8    | 16.5         | 13.4  | 13.0                        |
| 1992 | 12.9  | 19.6                 | 14.4  | 3.9    | 16.5         | 13.8  | 12.1                        |
| 1993 | 12.8  | 22.6                 | 14.2  | 4.0    | 15.1         | 13.6  | 11.4                        |
| 1994 | 12.8  | 25.1                 | 14.1  | 4.0    | 14.5         | 13.6  | 11.0                        |
| 1995 | 12.9  | 25.4                 | 14.1  | 4.0    | 13.3         | 13.6  | 10.7                        |
| 1996 | 12.8  | 25.4                 | 14.3  | 4.1    | 12.1         | 13.7  | 10.5                        |
| 1997 | 12.9  | 25.3                 | 14.8  | 4.2    | 11.8         | 14.1  | 10.2                        |
| 1998 | 13.3  | 25.8                 | 14.9  | 4.3    | 11.4         | 14.3  | 10.0                        |
| 1999 | 14.0  | 26.3                 | 15.1  | 4.4    | 10.3         | 14.5  | 9.7                         |
| 2000 | 14.9  | 26.9                 | 15.1  | 4.3    | 9.8          | 14.6  | 9.5                         |
| 2001 | 15.5  | 27.2                 | 14.9  | 4.3    | 9.0          | 14.4  | 9.1                         |
| 2002 | 16.2  | 27.4                 | 14.7  | 4.2    | 8.7          | 14.3  | 8.6                         |
| 2003 | 16.6  | 27.2                 | 14.5  | 4.1    | 8.7          | 14.2  | 8.1                         |
| 2004 | 16.7  | 27.0                 | 14.0  | 4.1    | 8.5          | 13.7  | 7.6                         |
| 2005 | 16.4  | 27.2                 | 14.1  | 3.9    | 8.4          | 13.7  | 7.2                         |
| 2006 | 15.8  | 26.0                 | 14.1  | 3.9    | 8.5          | 13.6  | 6.9                         |
| 2007 | 15.1  | 24.4                 | 14.3  | 3.8    | 8.3          | 13.6  | 6.5                         |
| 2008 | 14.4  | 23.2                 | 14.6  | 3.7    | 8.3          | 13.7  | 6.1                         |
| 2009 | 13.9  | 21.5                 | 14.7  | 3.7    | 8.4          | 13.7  | 5.8                         |
| 2010 | 13.5  | 20.7                 | 14.7  | 3.6    | 8.5          | 13.7  | 5.6                         |
| 2011 | 13.2  | 18.9                 | 14.8  | 3.5    | 8.4          | 13.7  | 5.4                         |
| 2012 | 12.9  | 17.4                 | 15.6  | 3.5    | 8.5          | 14.3  | 5.2                         |
| 2013 | 12.6  | 16.0                 | 16.2  | 3.4    | 8.6          | 14.7  | 5.0                         |
| 2014 | 12.2  | 14.8                 | 16.8  | 3.4    | 8.6          | 15.0  | 4.8                         |
| 2015 | 11.6  | 13.5                 | 16.8  | 3.3    | 8.4          | 14.9  | 4.7                         |
| 2016 | 11.3  | 12.3                 | 17.6  | 3.3    | 8.0          | 15.2  | 4.6                         |
| 2017 | 10.9  | 12.0                 | 18.1  | 3.3    | 7.9          | 15.6  | 4.7                         |
| 2018 | 10.7  | 11.8                 | 18.0  | 3.2    | 8.2          | 15.6  | 4.5                         |
| 2019 | 10.4  | 11.8                 | 18.0  | 3.2    | 8.4          | 15.5  | 4.5                         |

Appendix 1.4 Age-standardized mortality rates across BRICS and High-income Asia Pacific countries from 1990 and 2019 in HIV-positive populations

| Year | China | Russia | India | Brazil | South Africa | BRICS | High-income Asia Pacific |
|------|-------|--------|-------|--------|--------------|-------|--------------------------|
| 1990 | 0.10  | 0.26   | 0.03  | 1.76   | 3.52         | 0.24  | 0.03                     |
| 1991 | 0.12  | 0.28   | 0.06  | 1.93   | 6.10         | 0.32  | 0.03                     |
| 1992 | 0.14  | 0.34   | 0.14  | 2.07   | 10.39        | 0.44  | 0.03                     |
| 1993 | 0.16  | 0.51   | 0.28  | 2.27   | 16.97        | 0.62  | 0.03                     |
| 1994 | 0.18  | 0.69   | 0.48  | 2.39   | 26.47        | 0.88  | 0.04                     |
| 1995 | 0.19  | 0.71   | 0.76  | 2.46   | 38.64        | 1.20  | 0.04                     |
| 1996 | 0.20  | 0.71   | 1.13  | 2.38   | 53.07        | 1.58  | 0.05                     |
| 1997 | 0.20  | 0.68   | 1.59  | 2.11   | 73.65        | 2.08  | 0.04                     |
| 1998 | 0.21  | 0.65   | 2.11  | 1.98   | 96.91        | 2.67  | 0.04                     |
| 1999 | 0.22  | 0.86   | 2.66  | 1.90   | 118.18       | 3.26  | 0.04                     |
| 2000 | 0.23  | 0.97   | 3.11  | 1.81   | 142.10       | 3.86  | 0.04                     |
| 2001 | 0.24  | 1.02   | 3.39  | 1.74   | 162.15       | 4.33  | 0.04                     |
| 2002 | 0.24  | 1.11   | 3.51  | 1.63   | 186.11       | 4.80  | 0.05                     |
| 2003 | 0.23  | 1.19   | 3.55  | 1.57   | 209.65       | 5.23  | 0.05                     |
| 2004 | 0.23  | 1.19   | 3.51  | 1.47   | 226.15       | 5.50  | 0.05                     |
| 2005 | 0.23  | 1.32   | 3.44  | 1.36   | 234.87       | 5.63  | 0.05                     |
| 2006 | 0.20  | 1.18   | 3.33  | 1.28   | 235.49       | 5.57  | 0.05                     |
| 2007 | 0.18  | 1.09   | 3.17  | 1.22   | 223.63       | 5.29  | 0.05                     |
| 2008 | 0.17  | 1.06   | 3.00  | 1.19   | 205.59       | 4.92  | 0.05                     |
| 2009 | 0.16  | 0.97   | 2.72  | 1.15   | 184.34       | 4.44  | 0.05                     |
| 2010 | 0.15  | 0.96   | 2.39  | 1.10   | 164.97       | 3.97  | 0.05                     |
| 2011 | 0.14  | 0.90   | 2.12  | 1.04   | 143.29       | 3.49  | 0.05                     |
| 2012 | 0.13  | 0.83   | 1.95  | 0.99   | 122.84       | 3.07  | 0.05                     |
| 2013 | 0.13  | 0.76   | 1.77  | 0.97   | 107.11       | 2.73  | 0.05                     |
| 2014 | 0.14  | 0.74   | 1.54  | 0.94   | 97.57        | 2.47  | 0.05                     |
| 2015 | 0.14  | 0.69   | 1.28  | 0.91   | 92.34        | 2.28  | 0.04                     |
| 2016 | 0.15  | 0.65   | 1.10  | 0.90   | 89.49        | 2.16  | 0.05                     |
| 2017 | 0.14  | 0.54   | 0.96  | 0.86   | 84.60        | 2.00  | 0.05                     |
| 2018 | 0.13  | 0.51   | 0.88  | 0.81   | 75.55        | 1.81  | 0.05                     |
| 2019 | 0.13  | 0.48   | 0.85  | 0.78   | 69.99        | 1.70  | 0.05                     |

Appendix 1.5 Total number of deaths resulting from tuberculosis across BRICS and High-income Asia Pacific countries from 1990 and 2019 in HIV-positive populations

| Year | China | Russia | India | Brazil | South Africa | BRICS  | High-income Asia Pacific |
|------|-------|--------|-------|--------|--------------|--------|--------------------------|
| 1990 | 1.13  | 0.41   | 0.25  | 2.51   | 1.28         | 5.59   | 0.06                     |
| 1991 | 1.39  | 0.44   | 0.56  | 2.81   | 2.25         | 7.45   | 0.06                     |
| 1992 | 1.66  | 0.54   | 1.24  | 3.08   | 3.88         | 10.42  | 0.07                     |
| 1993 | 1.92  | 0.83   | 2.44  | 3.45   | 6.45         | 15.09  | 0.07                     |
| 1994 | 2.15  | 1.13   | 4.29  | 3.71   | 10.23        | 21.50  | 0.07                     |
| 1995 | 2.37  | 1.19   | 6.93  | 3.89   | 15.18        | 29.57  | 0.09                     |
| 1996 | 2.49  | 1.18   | 10.48 | 3.83   | 21.21        | 39.19  | 0.10                     |
| 1997 | 2.62  | 1.13   | 14.98 | 3.47   | 29.91        | 52.11  | 0.10                     |
| 1998 | 2.79  | 1.08   | 20.29 | 3.30   | 39.95        | 67.41  | 0.09                     |
| 1999 | 2.97  | 1.41   | 25.95 | 3.22   | 49.41        | 82.96  | 0.09                     |
| 2000 | 3.18  | 1.60   | 30.96 | 3.13   | 60.26        | 99.13  | 0.09                     |
| 2001 | 3.35  | 1.66   | 34.28 | 3.05   | 69.73        | 112.07 | 0.10                     |
| 2002 | 3.41  | 1.80   | 36.06 | 2.93   | 81.16        | 125.36 | 0.10                     |
| 2003 | 3.32  | 1.91   | 37.10 | 2.87   | 92.65        | 137.85 | 0.11                     |
| 2004 | 3.38  | 1.89   | 37.41 | 2.73   | 101.26       | 146.67 | 0.10                     |
| 2005 | 3.39  | 2.07   | 37.34 | 2.58   | 106.59       | 151.98 | 0.11                     |
| 2006 | 3.01  | 1.82   | 36.85 | 2.46   | 108.32       | 152.45 | 0.12                     |
| 2007 | 2.72  | 1.67   | 35.75 | 2.41   | 104.35       | 146.90 | 0.13                     |
| 2008 | 2.64  | 1.62   | 34.51 | 2.39   | 97.47        | 138.64 | 0.12                     |
| 2009 | 2.47  | 1.50   | 32.00 | 2.36   | 88.88        | 127.21 | 0.12                     |
| 2010 | 2.35  | 1.49   | 28.71 | 2.30   | 80.98        | 115.83 | 0.13                     |
| 2011 | 2.28  | 1.40   | 26.04 | 2.22   | 71.61        | 103.56 | 0.13                     |
| 2012 | 2.14  | 1.30   | 24.35 | 2.15   | 62.51        | 92.45  | 0.13                     |
| 2013 | 2.15  | 1.22   | 22.59 | 2.14   | 55.51        | 83.61  | 0.13                     |
| 2014 | 2.29  | 1.18   | 19.98 | 2.10   | 51.48        | 77.03  | 0.12                     |
| 2015 | 2.45  | 1.13   | 16.83 | 2.08   | 49.57        | 72.05  | 0.11                     |
| 2016 | 2.60  | 1.07   | 14.82 | 2.09   | 48.84        | 69.41  | 0.12                     |
| 2017 | 2.50  | 0.89   | 13.16 | 2.02   | 46.90        | 65.47  | 0.12                     |
| 2018 | 2.38  | 0.83   | 12.31 | 1.95   | 42.51        | 59.99  | 0.12                     |
| 2019 | 2.30  | 0.79   | 12.03 | 1.90   | 40.04        | 57.07  | 0.12                     |



Appendix 1.6 Relative proportion of tuberculosis to all death causes across BRICS and High-income Asia Pacific countries from 1990 and 2019 in HIV-positive populations

| Year | China | Russia<br>Federation | India | Brazil | South Africa | BRICS | High-income<br>Asia Pacific |
|------|-------|----------------------|-------|--------|--------------|-------|-----------------------------|
| 1990 | 0.08  | 0.67                 | 0.01  | 0.97   | 1.10         | 0.09  | 0.06                        |
| 1991 | 0.11  | 0.73                 | 0.01  | 1.13   | 1.92         | 0.12  | 0.06                        |
| 1992 | 0.13  | 0.87                 | 0.03  | 1.28   | 3.18         | 0.17  | 0.07                        |
| 1993 | 0.16  | 1.12                 | 0.06  | 1.46   | 5.25         | 0.25  | 0.07                        |
| 1994 | 0.19  | 1.35                 | 0.10  | 1.60   | 7.73         | 0.37  | 0.07                        |
| 1995 | 0.22  | 1.44                 | 0.17  | 1.73   | 10.53        | 0.52  | 0.09                        |
| 1996 | 0.25  | 1.53                 | 0.26  | 1.76   | 13.03        | 0.71  | 0.10                        |
| 1997 | 0.28  | 1.55                 | 0.37  | 1.67   | 15.61        | 0.95  | 0.09                        |
| 1998 | 0.32  | 1.50                 | 0.50  | 1.64   | 17.85        | 1.24  | 0.09                        |
| 1999 | 0.37  | 1.72                 | 0.65  | 1.64   | 19.36        | 1.56  | 0.09                        |
| 2000 | 0.43  | 1.80                 | 0.79  | 1.63   | 20.47        | 1.88  | 0.09                        |
| 2001 | 0.49  | 1.81                 | 0.89  | 1.62   | 21.17        | 2.17  | 0.09                        |
| 2002 | 0.54  | 1.88                 | 0.95  | 1.58   | 22.15        | 2.48  | 0.10                        |
| 2003 | 0.57  | 1.91                 | 1.01  | 1.56   | 23.09        | 2.79  | 0.10                        |
| 2004 | 0.62  | 1.92                 | 1.05  | 1.50   | 23.63        | 3.03  | 0.10                        |
| 2005 | 0.66  | 2.00                 | 1.05  | 1.44   | 23.94        | 3.18  | 0.10                        |
| 2006 | 0.64  | 1.92                 | 1.05  | 1.39   | 24.05        | 3.25  | 0.10                        |
| 2007 | 0.62  | 1.85                 | 1.04  | 1.37   | 23.80        | 3.21  | 0.11                        |
| 2008 | 0.62  | 1.81                 | 1.02  | 1.36   | 23.28        | 3.09  | 0.10                        |
| 2009 | 0.60  | 1.75                 | 0.99  | 1.34   | 22.73        | 2.97  | 0.10                        |
| 2010 | 0.60  | 1.75                 | 0.92  | 1.30   | 22.27        | 2.79  | 0.10                        |
| 2011 | 0.59  | 1.70                 | 0.85  | 1.26   | 21.45        | 2.56  | 0.10                        |
| 2012 | 0.57  | 1.59                 | 0.82  | 1.24   | 20.51        | 2.38  | 0.10                        |
| 2013 | 0.59  | 1.52                 | 0.78  | 1.23   | 19.60        | 2.21  | 0.09                        |
| 2014 | 0.64  | 1.47                 | 0.72  | 1.21   | 18.83        | 2.11  | 0.09                        |
| 2015 | 0.67  | 1.43                 | 0.63  | 1.19   | 18.41        | 2.03  | 0.08                        |
| 2016 | 0.70  | 1.37                 | 0.59  | 1.19   | 18.07        | 2.04  | 0.08                        |
| 2017 | 0.69  | 1.27                 | 0.54  | 1.16   | 17.65        | 1.98  | 0.08                        |
| 2018 | 0.68  | 1.21                 | 0.51  | 1.13   | 17.24        | 1.85  | 0.08                        |
| 2019 | 0.66  | 1.17                 | 0.51  | 1.11   | 16.94        | 1.80  | 0.07                        |

Appendix 2.1 Annual percentage change for tuberculosis mortality overall and in each age group across BRICS from 1990 and 2019 in HIV-negative populations

| Age group | China               | Russia              | India               | Brazil              | South Africa        |
|-----------|---------------------|---------------------|---------------------|---------------------|---------------------|
| 15-19     | -7.65(-9.41, -5.86) | -4.09(-8.49, 0.52)  | -5.88(-6.52, -5.24) | -3.38(-3.97, -2.79) | -2.61(-5.22, 0.07)  |
| 20-24     | -7.64(-8.58, -6.7)  | -2.84(-4.32, -1.34) | -5.05(-5.44, -4.66) | -3.76(-4.1, -3.42)  | -2.54(-3.96, -1.1)  |
| 25-29     | -7.84(-8.47, -7.2)  | -1.66(-2.45, -0.88) | -4.46(-4.74, -4.17) | -4.47(-4.72, -4.22) | -2.39(-3.41, -1.36) |
| 30-34     | -7.77(-8.3, -7.24)  | -0.96(-1.54, -0.38) | -4.01(-4.26, -3.77) | -5.01(-5.21, -4.81) | -1.97(-2.84, -1.1)  |
| 35-39     | -7.71(-8.16, -7.25) | -0.83(-1.33, -0.33) | -3.69(-3.9, -3.47)  | -5.18(-5.35, -5.01) | -1.64(-2.45, -0.83) |
| 40-44     | -7.77(-8.14, -7.39) | -1.41(-1.86, -0.96) | -3.43(-3.63, -3.24) | -4.99(-5.14, -4.84) | -1.49(-2.27, -0.71) |
| 45-49     | -7.99(-8.32, -7.65) | -2.09(-2.51, -1.67) | -3.64(-3.83, -3.46) | -4.66(-4.8, -4.52)  | -1.48(-2.26, -0.7)  |
| 50-54     | -8.39(-8.7, -8.08)  | -2.49(-2.88, -2.09) | -3.84(-4.01, -3.66) | -4.47(-4.61, -4.34) | -1.22(-2, -0.43)    |
| 55-59     | -8.72(-9.01, -8.44) | -2.81(-3.21, -2.4)  | -4.13(-4.3, -3.96)  | -4.41(-4.54, -4.27) | -0.48(-1.29, 0.34)  |
| 60-64     | -8.61(-8.86, -8.36) | -3.15(-3.61, -2.69) | -4.43(-4.59, -4.26) | -4.48(-4.62, -4.34) | -0.2(-1.06, 0.67)   |
| 65-69     | -8.31(-8.55, -8.06) | -3.62(-4.2, -3.04)  | -4.58(-4.75, -4.41) | -4.59(-4.74, -4.43) | -0.27(-1.22, 0.68)  |
| 70-74     | -7.85(-8.1, -7.59)  | -4.17(-5.01, -3.33) | -4.53(-4.73, -4.34) | -4.56(-4.74, -4.38) | -0.99(-2.13, 0.17)  |
| 75-79     | -7.4(-7.72, -7.09)  | -4.96(-6.13, -3.77) | -4.59(-4.86, -4.31) | -4.55(-4.79, -4.31) | -1.1(-2.87, 0.7)    |
| Overall   | -8.03(-8.25, -7.81) | -2.44(-2.79, -2.09) | -4.16(-4.27, -4.06) | -4.59(-4.67, -4.5)  | -1.34(-1.81, -0.88) |

Appendix 2.2 Annual percentage change for tuberculosis mortality overall and in each age group across BRICS from 1990 and 2019 in HIV-negative Male

| Age group | China               | Russia               | India               | Brazil              | South Africa        |
|-----------|---------------------|----------------------|---------------------|---------------------|---------------------|
| 15-19     | -7.08(-8.45, -5.69) | -5.71(-10.92, -0.19) | -5.14(-6.01, -4.26) | -2.95(-3.75, -2.13) | -1.51(-3.83, 0.87)  |
| 20-24     | -6.87(-7.58, -6.15) | -3.95(-5.5, -2.38)   | -4.33(-4.84, -3.82) | -3.26(-3.71, -2.81) | -1.45(-2.65, -0.23) |
| 25-29     | -7.06(-7.53, -6.58) | -2.57(-3.34, -1.8)   | -3.82(-4.19, -3.46) | -4.08(-4.4, -3.77)  | -1.51(-2.36, -0.66) |
| 30-34     | -7.1(-7.49, -6.71)  | -1.74(-2.29, -1.19)  | -3.49(-3.78, -3.19) | -4.81(-5.05, -4.56) | -1.45(-2.15, -0.75) |
| 35-39     | -7.07(-7.4, -6.74)  | -1.48(-1.94, -1.01)  | -3.24(-3.49, -2.98) | -5.09(-5.29, -4.88) | -1.41(-2.04, -0.77) |
| 40-44     | -7.07(-7.33, -6.8)  | -1.96(-2.37, -1.55)  | -3.04(-3.27, -2.81) | -4.88(-5.06, -4.7)  | -1.45(-2.04, -0.86) |
| 45-49     | -7.24(-7.48, -7.01) | -2.59(-2.97, -2.21)  | -3.31(-3.52, -3.1)  | -4.51(-4.67, -4.34) | -1.48(-2.06, -0.9)  |
| 50-54     | -7.69(-7.9, -7.48)  | -2.94(-3.3, -2.59)   | -3.62(-3.81, -3.42) | -4.25(-4.41, -4.09) | -1.25(-1.83, -0.67) |
| 55-59     | -8.18(-8.38, -7.99) | -3.21(-3.57, -2.84)  | -3.96(-4.15, -3.77) | -4.19(-4.35, -4.02) | -0.48(-1.09, 0.13)  |
| 60-64     | -8.28(-8.45, -8.1)  | -3.54(-3.96, -3.12)  | -4.28(-4.47, -4.09) | -4.31(-4.48, -4.14) | -0.24(-0.89, 0.42)  |
| 65-69     | -8.11(-8.27, -7.94) | -4.29(-4.83, -3.74)  | -4.39(-4.59, -4.2)  | -4.47(-4.66, -4.28) | -0.44(-1.17, 0.29)  |
| 70-74     | -7.61(-7.79, -7.44) | -5.06(-5.88, -4.23)  | -4.28(-4.51, -4.05) | -4.47(-4.69, -4.25) | -1.16(-2.05, -0.26) |
| 75-79     | -7.01(-7.24, -6.79) | -5.93(-7.15, -4.7)   | -4.26(-4.6, -3.93)  | -4.49(-4.78, -4.2)  | -1.45(-2.84, -0.04) |
| Overall   | -7.45(-7.6, -7.29)  | -3.12(-3.48, -2.75)  | -3.8(-3.92, -3.67)  | -4.39(-4.5, -4.28)  | -1.15(-1.52, -0.79) |

Appendix 2.3 Annual percentage change for tuberculosis mortality overall and in each age group across BRICS from 1990 and 2019 in HIV-negative Female

| Age group | China                | Russia              | India               | Brazil              | South Africa        |
|-----------|----------------------|---------------------|---------------------|---------------------|---------------------|
| 15-19     | -8.38(-11.3, -5.36)  | -1.11(-4.64, 2.54)  | -6.59(-7.41, -5.76) | -3.98(-4.55, -3.41) | -3.61(-7.05, -0.04) |
| 20-24     | -8.6(-10.2, -6.98)   | 0.17(-1.24, 1.59)   | -5.77(-6.29, -5.25) | -4.51(-4.85, -4.16) | -3.89(-5.9, -1.83)  |
| 25-29     | -8.88(-9.99, -7.75)  | 1.4(0.53, 2.28)     | -5.23(-5.63, -4.82) | -5.14(-5.41, -4.88) | -3.79(-5.28, -2.28) |
| 30-34     | -8.78(-9.74, -7.81)  | 2.2(1.48, 2.92)     | -4.74(-5.1, -4.39)  | -5.44(-5.67, -5.22) | -3.01(-4.34, -1.65) |
| 35-39     | -8.88(-9.73, -8.02)  | 2.31(1.66, 2.98)    | -4.38(-4.71, -4.04) | -5.44(-5.64, -5.24) | -2.1(-3.43, -0.75)  |
| 40-44     | -9.25(-9.98, -8.51)  | 1.79(1.16, 2.43)    | -4.08(-4.39, -3.76) | -5.28(-5.47, -5.09) | -1.37(-2.71, -0.01) |
| 45-49     | -9.62(-10.29, -8.94) | 1.26(0.62, 1.9)     | -4.16(-4.46, -3.86) | -5.08(-5.27, -4.9)  | -1.11(-2.48, 0.29)  |
| 50-54     | -9.92(-10.55, -9.29) | 0.75(0.12, 1.37)    | -4.16(-4.45, -3.88) | -5.04(-5.22, -4.86) | -0.85(-2.24, 0.57)  |
| 55-59     | -9.91(-10.5, -9.32)  | 0.19(-0.45, 0.83)   | -4.4(-4.67, -4.12)  | -4.98(-5.16, -4.8)  | -0.44(-1.87, 1.02)  |
| 60-64     | -9.34(-9.86, -8.81)  | -0.57(-1.24, 0.11)  | -4.57(-4.84, -4.3)  | -4.92(-5.1, -4.73)  | -0.38(-1.84, 1.1)   |
| 65-69     | -8.86(-9.36, -8.36)  | -1.81(-2.55, -1.07) | -4.69(-4.96, -4.41) | -4.8(-4.99, -4.61)  | -0.24(-1.78, 1.33)  |
| 70-74     | -8.67(-9.18, -8.16)  | -3.27(-4.17, -2.36) | -4.75(-5.06, -4.45) | -4.59(-4.8, -4.37)  | -0.75(-2.56, 1.1)   |
| 75-79     | -8.71(-9.31, -8.11)  | -4.38(-5.48, -3.26) | -4.9(-5.3, -4.5)    | -4.45(-4.72, -4.17) | -0.24(-3.01, 2.62)  |
| Overall   | -9.18(-9.6, -8.76)   | 0.34(-0.06, 0.74)   | -4.64(-4.8, -4.47)  | -5(-5.1, -4.89)     | -1.55(-2.31, -0.78) |

Appendix 2.4 Annual percentage change for tuberculosis mortality overall and in each age group across BRICS from 1990 and 2019 in HIV-positive populations

| Age group | China               | Russia             | India              | Brazil              | South Africa     |
|-----------|---------------------|--------------------|--------------------|---------------------|------------------|
| 15-19     | 0.33(-1.49, 2.18)   | -0.01(-5.05, 5.29) | 1.94(0.64, 3.25)   | -4.32(-5.1, -3.53)  | 7.7(6.5, 8.91)   |
| 20-24     | -0.32(-1.19, 0.57)  | 2.34(0.15, 4.58)   | -0.47(-1.32, 0.39) | -5.67(-6.08, -5.27) | 4.97(4.16, 5.79) |
| 25-29     | -0.6(-1.1, -0.1)    | 3.22(2.16, 4.28)   | -0.25(-0.91, 0.42) | -6.14(-6.4, -5.88)  | 4.71(4.07, 5.35) |
| 30-34     | -0.39(-0.78, 0)     | 3.24(2.52, 3.96)   | 1.42(0.82, 2.03)   | -5.71(-5.92, -5.51) | 5.82(5.24, 6.4)  |
| 35-39     | -0.29(-0.65, 0.07)  | 2.01(1.39, 2.62)   | 2.8(2.2, 3.4)      | -4.62(-4.8, -4.44)  | 6.93(6.36, 7.51) |
| 40-44     | -0.41(-0.75, -0.06) | 0.23(-0.44, 0.89)  | 3.72(3.08, 4.36)   | -3.35(-3.54, -3.15) | 7.55(6.95, 8.16) |
| 45-49     | -0.33(-0.71, 0.05)  | -0.74(-1.73, 0.27) | 4.62(3.87, 5.38)   | -2.2(-2.42, -1.97)  | 7.78(7.11, 8.46) |
| 50-54     | -0.21(-0.65, 0.23)  | -1.09(-2.36, 0.2)  | 5.75(4.73, 6.77)   | -1.47(-1.74, -1.19) | 7.71(6.93, 8.5)  |
| 55-59     | -0.45(-0.95, 0.06)  | -1.48(-3.26, 0.34) | 5.7(4.31, 7.12)    | -1.11(-1.46, -0.76) | 7.53(6.53, 8.54) |
| 60-64     | -0.89(-1.49, -0.29) | -1.74(-4.35, 0.95) | 4.79(2.5, 7.13)    | -0.74(-1.21, -0.27) | 7.58(6.03, 9.15) |
| 65-69     | -1.13(-2.01, -0.25) | -2.35(-6.71, 2.22) | 2.24(-3.23, 8.01)  | -0.11(-0.89, 0.68)  | 7.97(3.98, 12.1) |
| Overall   | -0.42(-0.68, -0.15) | 0.42(-0.32, 1.17)  | 3.09(2.42, 3.77)   | -3.32(-3.47, -3.17) | 6.97(6.4, 7.54)  |

Appendix 2.5 Annual percentage change for tuberculosis mortality overall and in each age group across BRICS from 1990 and 2019 in HIV-positive Male

| Age group | China               | Russia              | India               | Brazil              | South Africa        |
|-----------|---------------------|---------------------|---------------------|---------------------|---------------------|
| 15-19     | 0.54(-1.49, 2.61)   | -1.15(-7.16, 5.25)  | 1.93(0.34, 3.55)    | -5.01(-5.88, -4.14) | 12.25(10.52, 14.02) |
| 20-24     | 0(-0.95, 0.96)      | 1.28(-1.26, 3.89)   | -1.33(-2.33, -0.33) | -6.09(-6.5, -5.68)  | 7.01(5.85, 8.19)    |
| 25-29     | -0.18(-0.71, 0.36)  | 2.42(1.32, 3.53)    | -1.55(-2.27, -0.82) | -6.78(-7.04, -6.53) | 4.64(3.85, 5.45)    |
| 30-34     | 0.14(-0.27, 0.55)   | 2.64(1.94, 3.34)    | 0.21(-0.4, 0.83)    | -6.64(-6.84, -6.44) | 5.23(4.58, 5.89)    |
| 35-39     | 0.34(-0.03, 0.71)   | 1.43(0.85, 2.01)    | 1.84(1.24, 2.45)    | -5.63(-5.81, -5.46) | 6.48(5.86, 7.09)    |
| 40-44     | 0.17(-0.19, 0.52)   | -0.44(-1.06, 0.18)  | 2.97(2.33, 3.61)    | -4.2(-4.38, -4.01)  | 7.83(7.19, 8.47)    |
| 45-49     | 0.15(-0.24, 0.54)   | -1.41(-2.35, -0.46) | 3.94(3.19, 4.7)     | -2.81(-3.02, -2.6)  | 8.74(8.03, 9.45)    |
| 50-54     | 0.3(-0.16, 0.75)    | -1.59(-2.83, -0.33) | 5.01(3.98, 6.05)    | -1.86(-2.12, -1.59) | 8.9(8.06, 9.75)     |
| 55-59     | 0.03(-0.49, 0.56)   | -1.59(-3.45, 0.29)  | 5.06(3.61, 6.52)    | -1.39(-1.72, -1.05) | 8.47(7.38, 9.57)    |
| 60-64     | -0.53(-1.15, 0.09)  | -1.4(-4.29, 1.58)   | 4.24(1.85, 6.68)    | -0.98(-1.43, -0.52) | 8.01(6.36, 9.7)     |
| 65-69     | -0.92(-1.82, -0.01) | -1.85(-7.08, 3.67)  | 2.08(-3.75, 8.26)   | -0.1(-0.87, 0.67)   | 8.05(3.96, 12.31)   |
| Overall   | 0.05(-0.23, 0.33)   | -0.09(-0.9, 0.73)   | 2.33(1.64, 3.03)    | -3.93(-4.07, -3.79) | 7.64(7.02, 8.27)    |

Appendix 2.6 Annual percentage change for tuberculosis mortality overall and in each age group across BRICS from 1990 and 2019 in HIV-positive Female

| Age group | China               | Russia              | India             | Brazil              | South Africa      |
|-----------|---------------------|---------------------|-------------------|---------------------|-------------------|
| 15-19     | 0.2(-1.5, 1.93)     | 1.06(-2.11, 4.34)   | 2.15(0.77, 3.54)  | -3.16(-4.13, -2.17) | 6.34(4.91, 7.8)   |
| 20-24     | -0.78(-1.64, 0.09)  | 3.75(2.29, 5.24)    | 0.48(-0.48, 1.44) | -4.7(-5.26, -4.13)  | 4.72(3.79, 5.65)  |
| 25-29     | -1.45(-1.96, -0.94) | 5.06(4.21, 5.92)    | 1.2(0.4, 2)       | -4.64(-5.03, -4.26) | 5.01(4.25, 5.78)  |
| 30-34     | -1.62(-2.03, -1.2)  | 5.58(4.9, 6.26)     | 3.04(2.28, 3.8)   | -3.53(-3.84, -3.23) | 6.23(5.5, 6.96)   |
| 35-39     | -1.81(-2.21, -1.42) | 5(4.34, 5.66)       | 4.31(3.53, 5.1)   | -2.15(-2.44, -1.87) | 7.08(6.33, 7.83)  |
| 40-44     | -1.81(-2.19, -1.42) | 3.73(2.98, 4.48)    | 5.03(4.19, 5.88)  | -1.06(-1.37, -0.75) | 7.12(6.33, 7.92)  |
| 45-49     | -1.44(-1.86, -1.02) | 2.44(1.42, 3.48)    | 5.83(4.85, 6.82)  | -0.37(-0.74, -0.01) | 6.85(5.99, 7.72)  |
| 50-54     | -1.23(-1.7, -0.75)  | 0.89(-0.28, 2.07)   | 6.93(5.63, 8.24)  | -0.18(-0.62, 0.26)  | 6.62(5.63, 7.62)  |
| 55-59     | -1.39(-1.94, -0.85) | -0.86(-2.26, 0.56)  | 6.65(4.94, 8.39)  | -0.21(-0.75, 0.34)  | 6.69(5.44, 7.95)  |
| 60-64     | -1.62(-2.26, -0.97) | -2.12(-3.95, -0.25) | 5.6(2.8, 8.47)    | -0.06(-0.79, 0.68)  | 7.18(5.22, 9.18)  |
| 65-69     | -1.68(-2.63, -0.71) | -2.77(-5.56, 0.11)  | 2.55(-3.87, 9.4)  | -0.15(-1.29, 1.01)  | 7.93(2.75, 13.38) |
| Overall   | -1.42(-1.7, -1.14)  | 2.36(1.77, 2.96)    | 4.22(3.37, 5.08)  | -1.76(-1.99, -1.54) | 6.57(5.86, 7.3)   |

Appendix 3.1 Fitted longitudinal age effects of tuberculosis mortality (per 100 000 person-years) and the corresponding 95% CIs in HIV-negative populations

| Age group | China              | Russia              | India                  | Brazil           | South Africa           |
|-----------|--------------------|---------------------|------------------------|------------------|------------------------|
| 15-19     | 9.46(8.08, 11.07)  | 1.07(0.77, 1.49)    | 32.49(29.93, 35.26)    | 2.3(2.13, 2.48)  | 18.7(13.31, 26.27)     |
| 20-24     | 10.92(9.64, 12.37) | 6.62(5.64, 7.77)    | 43.57(40.71, 46.63)    | 4.18(3.95, 4.42) | 41.59(32.32, 53.51)    |
| 25-29     | 9.13(8.2, 10.16)   | 10.92(9.59, 12.44)  | 51.96(48.97, 55.12)    | 5.47(5.22, 5.73) | 69.57(56.29, 85.99)    |
| 30-34     | 9.23(8.41, 10.12)  | 14.07(12.61, 15.71) | 61.04(57.93, 64.33)    | 6.5(6.25, 6.77)  | 85.29(70.47, 103.24)   |
| 35-39     | 7.84(7.28, 8.44)   | 13.7(12.45, 15.06)  | 66.23(63.32, 69.27)    | 7.28(7.04, 7.51) | 81.29(68.52, 96.43)    |
| 40-44     | 6.94(6.48, 7.44)   | 16.41(15.14, 17.78) | 73.58(70.62, 76.67)    | 7.88(7.65, 8.12) | 80.81(68.59, 95.2)     |
| 45-49     | 5.94(5.56, 6.36)   | 27.64(25.93, 29.46) | 78.81(75.75, 82)       | 7.98(7.75, 8.21) | 91.25(78.17, 106.52)   |
| 50-54     | 5.32(4.97, 5.7)    | 24.97(23.36, 26.69) | 91.13(87.63, 94.77)    | 7.67(7.45, 7.9)  | 117.44(101.38, 136.04) |
| 55-59     | 5.04(4.7, 5.4)     | 20.13(18.64, 21.74) | 99.58(95.8, 103.51)    | 7.09(6.88, 7.31) | 144.7(124.46, 168.23)  |
| 60-64     | 4.85(4.52, 5.2)    | 14.36(13.08, 15.76) | 101.41(97.46, 105.53)  | 6.35(6.14, 6.56) | 141.14(119.04, 167.35) |
| 65-69     | 4.84(4.49, 5.22)   | 8.53(7.57, 9.61)    | 105.59(100.98, 110.41) | 6.09(5.86, 6.33) | 195.53(161.19, 237.18) |
| 70-74     | 4.98(4.61, 5.38)   | 4.91(4.22, 5.71)    | 113.45(108.17, 118.99) | 5.84(5.6, 6.09)  | 189.75(151.86, 237.08) |
| 75-79     | 4.46(4.1, 4.85)    | 3.21(2.65, 3.9)     | 118.23(112.1, 124.7)   | 5.74(5.48, 6.01) | 193.34(149.17, 250.59) |

Appendix 3.2 Fitted longitudinal age effects of tuberculosis mortality (per 100 000 person-years) and the corresponding 95% CIs in HIV-negative Male

| Age group | China             | Russia              | India                  | Brazil              | South Africa           |
|-----------|-------------------|---------------------|------------------------|---------------------|------------------------|
| 15-19     | 7.87(6.97, 8.88)  | 1.75(1.25, 2.45)    | 23.13(20.74, 25.8)     | 2.28(2.06, 2.53)    | 14.69(10.84, 19.91)    |
| 20-24     | 9.68(8.81, 10.63) | 11.73(10.09, 13.64) | 35.95(32.98, 39.2)     | 4.69(4.37, 5.05)    | 40.51(32.86, 49.92)    |
| 25-29     | 8.66(7.99, 9.37)  | 19.63(17.4, 22.14)  | 51.88(48.3, 55.72)     | 6.77(6.39, 7.18)    | 76.18(64.3, 90.25)     |
| 30-34     | 9.83(9.19, 10.52) | 25.7(23.24, 28.41)  | 67.93(63.88, 72.24)    | 9.08(8.65, 9.53)    | 109.43(94.42, 126.84)  |
| 35-39     | 9.35(8.86, 9.86)  | 24.23(22.22, 26.42) | 81.67(77.54, 86.02)    | 10.82(10.42, 11.25) | 114.44(100.48, 130.35) |
| 40-44     | 8.88(8.45, 9.32)  | 29.35(27.3, 31.56)  | 93.47(89.22, 97.93)    | 12.26(11.84, 12.69) | 124.58(110.35, 140.65) |
| 45-49     | 8.16(7.79, 8.55)  | 51.35(48.49, 54.37) | 107.37(102.73, 112.22) | 12.85(12.42, 13.29) | 154.66(138.34, 172.91) |
| 50-54     | 7.6(7.25, 7.96)   | 47.28(44.53, 50.21) | 118.66(113.54, 124)    | 12.6(12.18, 13.04)  | 203.91(183.39, 226.72) |
| 55-59     | 7.49(7.14, 7.86)  | 39.17(36.54, 41.99) | 134.62(128.88, 140.61) | 11.75(11.34, 12.17) | 248.26(222.34, 277.21) |
| 60-64     | 7.34(7, 7.7)      | 28.73(26.41, 31.25) | 143.4(137.11, 149.99)  | 10.62(10.22, 11.04) | 242.51(213.82, 275.05) |
| 65-69     | 7.58(7.2, 7.97)   | 17.32(15.53, 19.32) | 146.86(139.61, 154.48) | 10.15(9.71, 10.61)  | 328.21(284.03, 379.26) |
| 70-74     | 8.05(7.63, 8.49)  | 9.94(8.62, 11.48)   | 153.44(145.28, 162.06) | 9.65(9.19, 10.14)   | 314.06(264.86, 372.4)  |
| 75-79     | 7.64(7.2, 8.09)   | 6.11(5.02, 7.44)    | 155.65(146.28, 165.62) | 9.45(8.93, 9.99)    | 321.16(261.79, 394.01) |



Appendix 3.3 Fitted longitudinal age effects of tuberculosis mortality (per 100 000 person-years) and the corresponding 95% CIs in HIV-negative Female

| Age group | China               | Russia           | India               | Brazil           | South Africa          |
|-----------|---------------------|------------------|---------------------|------------------|-----------------------|
| 15-19     | 13.39(10.15, 17.65) | 0.29(0.2, 0.4)   | 47.42(42.36, 53.08) | 2.45(2.26, 2.64) | 23.8(14.73, 38.46)    |
| 20-24     | 14.31(11.41, 17.93) | 1.47(1.2, 1.79)  | 55.46(50.3, 61.16)  | 3.77(3.55, 4.01) | 42.84(29.01, 63.26)   |
| 25-29     | 10.94(8.97, 13.33)  | 2.32(1.95, 2.75) | 53.45(48.88, 58.45) | 4.25(4.03, 4.48) | 61.52(43.63, 86.74)   |
| 30-34     | 9.28(7.78, 11.06)   | 2.84(2.43, 3.31) | 54.23(49.97, 58.85) | 4.05(3.85, 4.25) | 59.56(43.15, 82.22)   |
| 35-39     | 6.36(5.54, 7.31)    | 3.32(2.9, 3.8)   | 49.3(45.89, 52.96)  | 3.91(3.75, 4.07) | 48.04(35.89, 64.3)    |
| 40-44     | 4.83(4.23, 5.52)    | 4.05(3.6, 4.57)  | 51.22(47.88, 54.8)  | 3.74(3.6, 3.89)  | 39.79(29.55, 53.6)    |
| 45-49     | 3.53(3.08, 4.04)    | 6.05(5.48, 6.69) | 46.8(43.71, 50.09)  | 3.42(3.3, 3.56)  | 36.43(26.86, 49.41)   |
| 50-54     | 2.9(2.53, 3.34)     | 5.85(5.29, 6.47) | 61.43(57.54, 65.59) | 3.15(3.03, 3.28) | 44.45(33.28, 59.37)   |
| 55-59     | 2.52(2.19, 2.91)    | 5.21(4.64, 5.84) | 63.63(59.63, 67.89) | 2.95(2.84, 3.08) | 60.67(45.82, 80.33)   |
| 60-64     | 2.35(2.03, 2.71)    | 4.47(3.89, 5.12) | 60.9(57, 65.06)     | 2.67(2.56, 2.79) | 66.05(48.48, 89.98)   |
| 65-69     | 2.21(1.9, 2.58)     | 3.74(3.17, 4.42) | 67.13(62.37, 72.25) | 2.69(2.56, 2.83) | 103.48(73.51, 145.67) |
| 70-74     | 2.18(1.85, 2.56)    | 3.19(2.65, 3.85) | 77.84(72.06, 84.08) | 2.77(2.63, 2.92) | 107.9(73.9, 157.55)   |
| 75-79     | 1.81(1.52, 2.16)    | 3.05(2.49, 3.75) | 86.44(79.48, 94.02) | 2.92(2.76, 3.09) | 119.66(78.62, 182.13) |

Appendix 3.4 Relative risk of each period compared with the reference (2000–2004) and the corresponding 95%

| CIs in HIV-negative populations |                  |                  |                  |                  |                  |
|---------------------------------|------------------|------------------|------------------|------------------|------------------|
| Periods                         | China            | Russia           | India            | Brazil           | South Africa     |
| <b>HIV-negative populations</b> |                  |                  |                  |                  |                  |
| 1990-1994                       | 2.03(1.94, 2.12) | 0.55(0.51, 0.6)  | 1.45(1.41, 1.49) | 1.52(1.49, 1.56) | 0.72(0.63, 0.83) |
| 1995-1999                       | 1.36(1.3, 1.42)  | 0.79(0.74, 0.84) | 1.23(1.19, 1.26) | 1.28(1.25, 1.31) | 0.77(0.68, 0.87) |
| 2000-2004                       | 1.00             | 1.00             | 1.00             | 1.00             | 1.00             |
| 2005-2009                       | 0.6(0.57, 0.63)  | 0.85(0.8, 0.9)   | 0.77(0.74, 0.79) | 0.75(0.73, 0.77) | 1.03(0.93, 1.15) |
| 2010-2014                       | 0.37(0.35, 0.39) | 0.52(0.48, 0.55) | 0.63(0.61, 0.65) | 0.6(0.58, 0.61)  | 0.68(0.61, 0.76) |
| 2015-2019                       | 0.26(0.25, 0.28) | 0.31(0.29, 0.34) | 0.52(0.5, 0.53)  | 0.49(0.48, 0.51) | 0.48(0.42, 0.54) |
| <b>HIV-negative Male</b>        |                  |                  |                  |                  |                  |
| 1990-1994                       | 1.91(1.85, 1.97) | 0.57(0.54, 0.62) | 1.38(1.33, 1.42) | 1.49(1.45, 1.54) | 0.68(0.61, 0.75) |
| 1995-1999                       | 1.3(1.26, 1.34)  | 0.82(0.77, 0.86) | 1.2(1.16, 1.24)  | 1.26(1.22, 1.29) | 0.81(0.74, 0.89) |
| 2000-2004                       | 1.00             | 1.00             | 1.00             | 1.00             | 1.00             |
| 2005-2009                       | 0.62(0.6, 0.64)  | 0.82(0.77, 0.86) | 0.79(0.77, 0.82) | 0.76(0.74, 0.78) | 1.02(0.94, 1.11) |
| 2010-2014                       | 0.39(0.38, 0.41) | 0.48(0.44, 0.51) | 0.66(0.64, 0.68) | 0.61(0.59, 0.63) | 0.69(0.63, 0.75) |
| 2015-2019                       | 0.29(0.27, 0.3)  | 0.27(0.25, 0.3)  | 0.53(0.51, 0.55) | 0.5(0.49, 0.52)  | 0.5(0.45, 0.55)  |
| <b>HIV-negative Female</b>      |                  |                  |                  |                  |                  |
| 1990-1994                       | 2.26(2.08, 2.45) | 0.47(0.42, 0.52) | 1.55(1.48, 1.62) | 1.58(1.53, 1.63) | 0.77(0.63, 0.95) |
| 1995-1999                       | 1.47(1.35, 1.59) | 0.65(0.59, 0.71) | 1.26(1.21, 1.32) | 1.33(1.29, 1.37) | 0.66(0.54, 0.81) |
| 2000-2004                       | 1.00             | 1.00             | 1.00             | 1.00             | 1.00             |
| 2005-2009                       | 0.56(0.5, 0.61)  | 1.04(0.97, 1.13) | 0.73(0.69, 0.76) | 0.73(0.71, 0.75) | 1.07(0.9, 1.27)  |
| 2010-2014                       | 0.31(0.28, 0.35) | 0.73(0.67, 0.79) | 0.59(0.56, 0.62) | 0.56(0.54, 0.58) | 0.67(0.55, 0.81) |
| 2015-2019                       | 0.22(0.19, 0.25) | 0.49(0.45, 0.54) | 0.5(0.47, 0.52)  | 0.47(0.45, 0.49) | 0.44(0.35, 0.54) |

Appendix 3.5 Relative risk of each cohort compared with the reference (cohort 1955–1959) and the corresponding 95% CIs in HIV-negative populations

| Cohorts   | China               | Russia           | India            | Brazil           | South Africa     |
|-----------|---------------------|------------------|------------------|------------------|------------------|
| 1915-1919 | 27.95(24.89, 31.38) | 5.52(3.75, 8.11) | 6.1(5.56, 6.7)   | 6.27(5.79, 6.79) | 1.32(0.73, 2.36) |
| 1920-1924 | 18.81(17.12, 20.65) | 3.69(2.82, 4.84) | 4.85(4.54, 5.19) | 4.85(4.57, 5.14) | 1.39(0.97, 2)    |
| 1925-1929 | 13.4(12.33, 14.56)  | 2.77(2.32, 3.3)  | 3.91(3.69, 4.13) | 3.87(3.68, 4.06) | 1.2(0.9, 1.6)    |
| 1930-1934 | 9.32(8.63, 10.07)   | 2.21(1.94, 2.52) | 3.11(2.96, 3.26) | 3.09(2.96, 3.23) | 1.12(0.88, 1.44) |
| 1935-1939 | 6.22(5.78, 6.7)     | 1.8(1.61, 2.01)  | 2.4(2.29, 2.51)  | 2.45(2.36, 2.55) | 1.01(0.82, 1.26) |
| 1940-1944 | 3.95(3.68, 4.25)    | 1.5(1.37, 1.64)  | 1.89(1.81, 1.97) | 1.94(1.87, 2.01) | 1.09(0.9, 1.32)  |
| 1945-1949 | 2.43(2.26, 2.61)    | 1.25(1.14, 1.37) | 1.56(1.5, 1.63)  | 1.5(1.45, 1.55)  | 1.06(0.89, 1.26) |
| 1950-1954 | 1.58(1.48, 1.69)    | 1.11(1.03, 1.2)  | 1.2(1.15, 1.25)  | 1.21(1.17, 1.25) | 1.11(0.95, 1.3)  |
| 1955-1959 | 1.00                | 1.00             | 1.00             | 1.00             | 1.00             |
| 1960-1964 | 0.63(0.59, 0.68)    | 0.87(0.8, 0.93)  | 0.84(0.81, 0.88) | 0.79(0.76, 0.81) | 0.9(0.76, 1.05)  |
| 1965-1969 | 0.45(0.42, 0.49)    | 0.79(0.72, 0.86) | 0.72(0.69, 0.75) | 0.6(0.58, 0.62)  | 0.81(0.68, 0.96) |
| 1970-1974 | 0.31(0.28, 0.34)    | 0.75(0.68, 0.84) | 0.6(0.57, 0.63)  | 0.45(0.44, 0.47) | 0.78(0.65, 0.94) |
| 1975-1979 | 0.2(0.18, 0.23)     | 0.82(0.72, 0.92) | 0.5(0.47, 0.53)  | 0.34(0.33, 0.36) | 0.78(0.64, 0.95) |
| 1980-1984 | 0.13(0.11, 0.15)    | 0.78(0.68, 0.9)  | 0.38(0.36, 0.41) | 0.27(0.26, 0.28) | 0.61(0.49, 0.77) |
| 1985-1989 | 0.09(0.07, 0.1)     | 0.61(0.52, 0.72) | 0.31(0.28, 0.33) | 0.22(0.21, 0.24) | 0.53(0.41, 0.68) |
| 1990-1994 | 0.06(0.05, 0.08)    | 0.5(0.39, 0.64)  | 0.23(0.21, 0.25) | 0.19(0.18, 0.21) | 0.46(0.33, 0.63) |
| 1995-1999 | 0.04(0.03, 0.06)    | 0.39(0.23, 0.64) | 0.16(0.14, 0.18) | 0.17(0.16, 0.19) | 0.45(0.28, 0.71) |
| 2000-2004 | 0.03(0.01, 0.05)    | 0.3(0.06, 1.5)   | 0.11(0.08, 0.13) | 0.14(0.11, 0.17) | 0.38(0.16, 0.93) |

Appendix 3.6 Relative risk of each cohort compared with the reference (cohort 1955–1959) and the corresponding 95% CIs in HIV-negative Male

| Cohorts   | China               | Russia            | India            | Brazil           | South Africa     |
|-----------|---------------------|-------------------|------------------|------------------|------------------|
| 1915-1919 | 22.82(21.01, 24.79) | 7.39(4.92, 11.08) | 5.51(4.92, 6.17) | 5.93(5.39, 6.54) | 1.45(0.92, 2.28) |
| 1920-1924 | 16.27(15.24, 17.37) | 4.81(3.67, 6.3)   | 4.47(4.13, 4.84) | 4.55(4.24, 4.88) | 1.41(1.06, 1.87) |
| 1925-1929 | 12.02(11.35, 12.73) | 3.44(2.91, 4.06)  | 3.64(3.42, 3.89) | 3.64(3.43, 3.86) | 1.22(0.98, 1.52) |
| 1930-1934 | 8.46(8.02, 8.92)    | 2.45(2.17, 2.77)  | 2.95(2.8, 3.12)  | 2.94(2.8, 3.1)   | 1.12(0.93, 1.35) |
| 1935-1939 | 5.66(5.38, 5.96)    | 1.93(1.75, 2.14)  | 2.34(2.22, 2.46) | 2.36(2.25, 2.46) | 1.01(0.86, 1.19) |
| 1940-1944 | 3.62(3.44, 3.8)     | 1.6(1.48, 1.74)   | 1.85(1.76, 1.94) | 1.84(1.77, 1.92) | 1.07(0.93, 1.24) |
| 1945-1949 | 2.27(2.16, 2.38)    | 1.29(1.19, 1.4)   | 1.52(1.45, 1.6)  | 1.44(1.39, 1.5)  | 1.03(0.91, 1.17) |
| 1950-1954 | 1.5(1.43, 1.58)     | 1.13(1.06, 1.21)  | 1.18(1.13, 1.24) | 1.18(1.14, 1.23) | 1.09(0.97, 1.22) |
| 1955-1959 | 1.00                | 1.00              | 1.00             | 1.00             | 1.00             |
| 1960-1964 | 0.67(0.63, 0.71)    | 0.84(0.79, 0.9)   | 0.86(0.82, 0.9)  | 0.79(0.76, 0.82) | 0.88(0.78, 0.99) |
| 1965-1969 | 0.5(0.47, 0.52)     | 0.75(0.69, 0.81)  | 0.74(0.7, 0.78)  | 0.6(0.57, 0.62)  | 0.77(0.68, 0.88) |
| 1970-1974 | 0.34(0.32, 0.37)    | 0.69(0.62, 0.75)  | 0.64(0.6, 0.68)  | 0.45(0.43, 0.47) | 0.77(0.67, 0.88) |
| 1975-1979 | 0.23(0.22, 0.25)    | 0.73(0.65, 0.81)  | 0.54(0.51, 0.58) | 0.35(0.33, 0.37) | 0.78(0.67, 0.91) |
| 1980-1984 | 0.16(0.14, 0.17)    | 0.66(0.58, 0.75)  | 0.43(0.4, 0.46)  | 0.28(0.26, 0.3)  | 0.66(0.55, 0.78) |
| 1985-1989 | 0.11(0.1, 0.12)     | 0.49(0.41, 0.57)  | 0.36(0.33, 0.39) | 0.24(0.22, 0.25) | 0.58(0.47, 0.72) |
| 1990-1994 | 0.08(0.07, 0.1)     | 0.38(0.29, 0.48)  | 0.28(0.25, 0.32) | 0.22(0.19, 0.24) | 0.55(0.43, 0.72) |
| 1995-1999 | 0.06(0.04, 0.07)    | 0.26(0.15, 0.45)  | 0.21(0.18, 0.25) | 0.2(0.17, 0.23)  | 0.58(0.39, 0.85) |
| 2000-2004 | 0.03(0.02, 0.06)    | 0.17(0.02, 1.2)   | 0.14(0.1, 0.19)  | 0.15(0.12, 0.2)  | 0.5(0.23, 1.09)  |

Appendix 3.7 Relative risk of each cohort compared with the reference (cohort 1955–1959) and the corresponding 95% CIs in HIV-negative Female

| Cohorts   | China               | Russia           | India            | Brazil           | South Africa     |
|-----------|---------------------|------------------|------------------|------------------|------------------|
| 1915-1919 | 48.3(38.49, 60.62)  | 2.74(1.91, 3.93) | 6.85(5.96, 7.87) | 6.83(6.22, 7.51) | 1.06(0.42, 2.7)  |
| 1920-1924 | 28.28(23.4, 34.18)  | 2.09(1.58, 2.77) | 5.31(4.79, 5.89) | 5.41(5.04, 5.81) | 1.35(0.75, 2.44) |
| 1925-1929 | 17.87(15.06, 21.21) | 1.51(1.22, 1.87) | 4.16(3.8, 4.55)  | 4.36(4.1, 4.63)  | 1.17(0.73, 1.88) |
| 1930-1934 | 11.65(9.93, 13.67)  | 1.16(0.97, 1.4)  | 3.25(3, 3.52)    | 3.48(3.3, 3.68)  | 1.17(0.77, 1.76) |
| 1935-1939 | 7.62(6.54, 8.88)    | 1.01(0.85, 1.19) | 2.49(2.31, 2.68) | 2.74(2.61, 2.88) | 1.06(0.73, 1.54) |
| 1940-1944 | 4.76(4.1, 5.53)     | 0.93(0.81, 1.08) | 1.95(1.82, 2.1)  | 2.19(2.09, 2.29) | 1.13(0.81, 1.59) |
| 1945-1949 | 2.85(2.46, 3.29)    | 0.9(0.78, 1.04)  | 1.6(1.5, 1.72)   | 1.66(1.59, 1.73) | 1.08(0.78, 1.5)  |
| 1950-1954 | 1.78(1.55, 2.04)    | 0.94(0.84, 1.06) | 1.24(1.16, 1.33) | 1.27(1.22, 1.33) | 1.11(0.82, 1.5)  |
| 1955-1959 | 1.00                | 1.00             | 1.00             | 1.00             | 1.00             |
| 1960-1964 | 0.55(0.47, 0.65)    | 1.02(0.92, 1.14) | 0.81(0.76, 0.87) | 0.77(0.74, 0.81) | 0.97(0.72, 1.3)  |
| 1965-1969 | 0.37(0.31, 0.43)    | 1.11(0.98, 1.25) | 0.69(0.64, 0.75) | 0.59(0.57, 0.62) | 0.92(0.68, 1.24) |
| 1970-1974 | 0.24(0.2, 0.29)     | 1.26(1.09, 1.45) | 0.54(0.5, 0.58)  | 0.44(0.42, 0.47) | 0.83(0.6, 1.14)  |
| 1975-1979 | 0.15(0.12, 0.19)    | 1.51(1.29, 1.76) | 0.43(0.4, 0.47)  | 0.33(0.31, 0.35) | 0.78(0.55, 1.09) |
| 1980-1984 | 0.09(0.07, 0.12)    | 1.72(1.45, 2.04) | 0.32(0.29, 0.35) | 0.25(0.24, 0.27) | 0.56(0.38, 0.81) |
| 1985-1989 | 0.06(0.04, 0.08)    | 1.62(1.33, 1.98) | 0.25(0.22, 0.27) | 0.19(0.18, 0.21) | 0.46(0.3, 0.69)  |
| 1990-1994 | 0.04(0.03, 0.06)    | 1.51(1.16, 1.97) | 0.18(0.16, 0.21) | 0.16(0.15, 0.18) | 0.36(0.22, 0.6)  |
| 1995-1999 | 0.03(0.01, 0.05)    | 1.35(0.85, 2.15) | 0.12(0.1, 0.14)  | 0.14(0.13, 0.16) | 0.34(0.17, 0.67) |
| 2000-2004 | 0.02(0.01, 0.05)    | 1.2(0.35, 4.11)  | 0.08(0.06, 0.1)  | 0.12(0.1, 0.14)  | 0.3(0.09, 0.99)  |

Appendix 4.1 Fitted longitudinal age effects of tuberculosis mortality (per 100 000 person-years) and the corresponding 95% CIs in HIV-positive populations

| Age group | China            | Russia           | India            | Brazil           | South Africa           |
|-----------|------------------|------------------|------------------|------------------|------------------------|
| 15-19     | 0.02(0.02, 0.02) | 0.05(0.03, 0.08) | 0.17(0.13, 0.21) | 0.91(0.82, 1)    | 2.58(2.07, 3.22)       |
| 20-24     | 0.07(0.06, 0.08) | 0.14(0.11, 0.19) | 0.72(0.61, 0.85) | 2.57(2.42, 2.72) | 11.45(9.76, 13.43)     |
| 25-29     | 0.19(0.17, 0.21) | 0.72(0.61, 0.85) | 1.89(1.64, 2.16) | 4.66(4.45, 4.87) | 32.71(28.72, 37.25)    |
| 30-34     | 0.28(0.26, 0.31) | 1.53(1.33, 1.75) | 2.73(2.43, 3.06) | 5.19(5.01, 5.38) | 66.25(59.45, 73.83)    |
| 35-39     | 0.32(0.3, 0.34)  | 2.29(2.05, 2.56) | 3.21(2.93, 3.53) | 4.58(4.42, 4.75) | 111.12(101.67, 121.45) |
| 40-44     | 0.32(0.3, 0.35)  | 2.45(2.22, 2.71) | 3.57(3.32, 3.85) | 3.7(3.56, 3.84)  | 164.01(152.69, 176.17) |
| 45-49     | 0.3(0.28, 0.32)  | 0.93(0.81, 1.07) | 3.71(3.45, 3.99) | 2.84(2.73, 2.96) | 224.99(211.15, 239.74) |
| 50-54     | 0.25(0.23, 0.27) | 0.47(0.39, 0.58) | 3.44(3.13, 3.77) | 1.91(1.82, 2.01) | 271.89(251.43, 294.01) |
| 55-59     | 0.21(0.19, 0.23) | 0.21(0.16, 0.28) | 2.39(2.09, 2.73) | 1.48(1.4, 1.57)  | 288.26(259.77, 319.88) |
| 60-64     | 0.21(0.19, 0.24) | 0.1(0.07, 0.16)  | 1.63(1.34, 2)    | 1.1(1.02, 1.19)  | 313.09(271.3, 361.31)  |
| 65-69     | 0.22(0.2, 0.25)  | 0.06(0.03, 0.11) | 1.15(0.85, 1.56) | 0.95(0.86, 1.04) | 358.01(295.37, 433.94) |

Appendix 4.2 Fitted longitudinal age effects of tuberculosis mortality (per 100 000 person-years) and the corresponding 95% CIs in HIV-positive Male

| Age group | China            | Russia           | India            | Brazil           | South Africa           |
|-----------|------------------|------------------|------------------|------------------|------------------------|
| 15-19     | 0.02(0.01, 0.02) | 0.07(0.04, 0.11) | 0.15(0.11, 0.2)  | 1.32(1.19, 1.46) | 0.88(0.63, 1.24)       |
| 20-24     | 0.08(0.07, 0.09) | 0.19(0.14, 0.26) | 0.78(0.66, 0.93) | 3.91(3.69, 4.14) | 3.31(2.68, 4.08)       |
| 25-29     | 0.22(0.2, 0.25)  | 1.14(0.96, 1.34) | 2.32(2.02, 2.67) | 7.37(7.05, 7.69) | 18.01(15.54, 20.86)    |
| 30-34     | 0.36(0.34, 0.39) | 2.52(2.22, 2.86) | 3.52(3.14, 3.96) | 8.26(7.98, 8.55) | 55.35(49.33, 62.11)    |
| 35-39     | 0.43(0.4, 0.46)  | 4.01(3.62, 4.44) | 4.15(3.77, 4.55) | 7.09(6.86, 7.33) | 119.71(109.34, 131.05) |
| 40-44     | 0.45(0.42, 0.48) | 4.34(3.96, 4.76) | 4.46(4.14, 4.81) | 5.57(5.38, 5.77) | 190.11(177.06, 204.13) |
| 45-49     | 0.43(0.4, 0.46)  | 1.54(1.35, 1.76) | 4.43(4.12, 4.78) | 4.13(3.97, 4.3)  | 255.9(240.4, 272.39)   |
| 50-54     | 0.36(0.33, 0.39) | 0.78(0.64, 0.93) | 3.8(3.45, 4.18)  | 2.72(2.59, 2.85) | 293.63(271.76, 317.25) |
| 55-59     | 0.31(0.28, 0.34) | 0.31(0.23, 0.42) | 2.51(2.18, 2.89) | 2.07(1.96, 2.19) | 314.19(282.58, 349.32) |
| 60-64     | 0.31(0.28, 0.35) | 0.15(0.09, 0.23) | 1.67(1.35, 2.07) | 1.51(1.41, 1.63) | 363.85(313.3, 422.56)  |
| 65-69     | 0.34(0.3, 0.39)  | 0.09(0.05, 0.17) | 1.15(0.83, 1.6)  | 1.26(1.15, 1.39) | 463.2(378.54, 566.8)   |

Appendix 4.3 Fitted longitudinal age effects of tuberculosis mortality (per 100 000 person-years) and the corresponding 95% CIs in HIV-positive Female

| Age group | China            | Russia           | India            | Brazil           | South Africa           |
|-----------|------------------|------------------|------------------|------------------|------------------------|
| 15-19     | 0.02(0.02, 0.03) | 0.03(0.02, 0.03) | 0.16(0.12, 0.21) | 0.45(0.39, 0.51) | 4.01(3.1, 5.17)        |
| 20-24     | 0.07(0.06, 0.08) | 0.07(0.05, 0.09) | 0.59(0.48, 0.73) | 1.19(1.09, 1.29) | 18.22(15, 22.13)       |
| 25-29     | 0.16(0.14, 0.17) | 0.26(0.22, 0.3)  | 1.39(1.16, 1.65) | 2.02(1.88, 2.17) | 45.39(38.53, 53.47)    |
| 30-34     | 0.2(0.19, 0.22)  | 0.48(0.42, 0.55) | 1.89(1.63, 2.19) | 2.24(2.11, 2.39) | 77.33(67.21, 88.98)    |
| 35-39     | 0.2(0.19, 0.22)  | 0.6(0.53, 0.68)  | 2.23(1.97, 2.51) | 2.15(2.03, 2.28) | 107.12(95.1, 120.65)   |
| 40-44     | 0.19(0.17, 0.2)  | 0.61(0.54, 0.68) | 2.59(2.35, 2.86) | 1.87(1.77, 1.99) | 144.89(131.43, 159.73) |
| 45-49     | 0.16(0.15, 0.18) | 0.35(0.3, 0.41)  | 2.89(2.63, 3.16) | 1.62(1.52, 1.72) | 201.24(184.54, 219.44) |
| 50-54     | 0.14(0.12, 0.15) | 0.21(0.18, 0.26) | 3.05(2.73, 3.41) | 1.17(1.09, 1.27) | 252.63(227.2, 280.9)   |
| 55-59     | 0.11(0.1, 0.13)  | 0.15(0.11, 0.19) | 2.31(1.96, 2.72) | 1(0.91, 1.09)    | 263.37(229.47, 302.28) |
| 60-64     | 0.11(0.1, 0.13)  | 0.09(0.06, 0.12) | 1.65(1.3, 2.1)   | 0.79(0.71, 0.89) | 270.4(224.53, 325.65)  |
| 65-69     | 0.11(0.09, 0.12) | 0.06(0.04, 0.09) | 1.22(0.85, 1.75) | 0.74(0.64, 0.85) | 285.63(222.81, 366.16) |

Appendix 4.4 Relative risk of each period compared with the reference (2000–2004) and the corresponding 95%

| CIs in HIV-positive populations |                  |                  |                  |                  |                  |
|---------------------------------|------------------|------------------|------------------|------------------|------------------|
| Periods                         | China            | Russia           | India            | Brazil           | South Africa     |
| HIV-positive populations        |                  |                  |                  |                  |                  |
| 1990-1994                       | 0.55(0.51, 0.59) | 0.35(0.3, 0.4)   | 0.14(0.11, 0.16) | 1.34(1.29, 1.39) | 0.07(0.06, 0.08) |
| 1995-1999                       | 0.83(0.78, 0.88) | 0.65(0.58, 0.73) | 0.49(0.46, 0.53) | 1.33(1.28, 1.37) | 0.41(0.38, 0.44) |
| 2000-2004                       | 1.00             | 1.00             | 1.00             | 1.00             | 1.00             |
| 2005-2009                       | 0.8(0.76, 0.85)  | 0.97(0.87, 1.08) | 0.94(0.89, 0.99) | 0.79(0.76, 0.82) | 1.21(1.15, 1.27) |
| 2010-2014                       | 0.59(0.56, 0.63) | 0.65(0.57, 0.74) | 0.62(0.58, 0.67) | 0.69(0.67, 0.72) | 0.75(0.7, 0.79)  |
| 2015-2019                       | 0.61(0.57, 0.65) | 0.4(0.34, 0.47)  | 0.35(0.32, 0.38) | 0.63(0.61, 0.66) | 0.51(0.47, 0.55) |
| HIV-positive Male               |                  |                  |                  |                  |                  |
| 1990-1994                       | 0.56(0.52, 0.6)  | 0.34(0.29, 0.39) | 0.15(0.12, 0.18) | 1.57(1.51, 1.62) | 0.07(0.06, 0.09) |
| 1995-1999                       | 0.83(0.78, 0.89) | 0.65(0.59, 0.73) | 0.51(0.48, 0.55) | 1.42(1.37, 1.47) | 0.42(0.39, 0.45) |
| 2000-2004                       | 1.00             | 1.00             | 1.00             | 1.00             | 1.00             |
| 2005-2009                       | 0.83(0.78, 0.88) | 0.94(0.85, 1.04) | 0.9(0.85, 0.95)  | 0.77(0.74, 0.8)  | 1.23(1.17, 1.3)  |
| 2010-2014                       | 0.65(0.61, 0.69) | 0.58(0.51, 0.67) | 0.55(0.51, 0.6)  | 0.69(0.66, 0.71) | 0.83(0.78, 0.89) |
| 2015-2019                       | 0.68(0.64, 0.73) | 0.35(0.3, 0.41)  | 0.32(0.29, 0.36) | 0.63(0.6, 0.65)  | 0.61(0.56, 0.65) |
| HIV-positive Female             |                  |                  |                  |                  |                  |
| 1990-1994                       | 0.53(0.49, 0.57) | 0.39(0.34, 0.45) | 0.12(0.1, 0.15)  | 0.88(0.83, 0.93) | 0.07(0.06, 0.09) |
| 1995-1999                       | 0.81(0.76, 0.86) | 0.6(0.53, 0.68)  | 0.47(0.43, 0.51) | 1.14(1.09, 1.2)  | 0.41(0.37, 0.45) |
| 2000-2004                       | 1.00             | 1.00             | 1.00             | 1.00             | 1.00             |
| 2005-2009                       | 0.74(0.7, 0.79)  | 1.13(1.02, 1.26) | 1(0.93, 1.06)    | 0.82(0.78, 0.86) | 1.21(1.14, 1.29) |
| 2010-2014                       | 0.47(0.44, 0.5)  | 0.94(0.83, 1.05) | 0.74(0.68, 0.8)  | 0.71(0.67, 0.75) | 0.71(0.66, 0.77) |
| 2015-2019                       | 0.47(0.44, 0.5)  | 0.66(0.58, 0.75) | 0.39(0.35, 0.44) | 0.65(0.61, 0.69) | 0.46(0.42, 0.51) |



Appendix 4.5 Relative risk of each cohort compared with the reference (cohort 1955–1959) and the corresponding 95% CIs in HIV-positive populations

| Cohorts   | China            | Russia           | India            | Brazil           | South Africa        |
|-----------|------------------|------------------|------------------|------------------|---------------------|
| 1915-1919 | 1.43(1.07, 1.9)  | 2.02(0.47, 5.61) | 0.39(0.06, 2.5)  | 1.17(0.91, 1.5)  | 0.07(0.02, 0.24)    |
| 1920-1924 | 1.32(1.1, 1.59)  | 1.61(0.71, 3.66) | 0.28(0.14, 0.56) | 1.32(1.14, 1.53) | 0.11(0.07, 0.17)    |
| 1925-1929 | 1.12(0.97, 1.3)  | 1.51(0.87, 2.61) | 0.29(0.19, 0.42) | 1.35(1.21, 1.5)  | 0.16(0.12, 0.21)    |
| 1930-1934 | 1.05(0.93, 1.19) | 1.26(0.87, 1.84) | 0.29(0.22, 0.39) | 1.27(1.17, 1.38) | 0.23(0.19, 0.28)    |
| 1935-1939 | 1.07(0.96, 1.19) | 1.16(0.85, 1.57) | 0.44(0.37, 0.52) | 1.24(1.17, 1.32) | 0.33(0.28, 0.38)    |
| 1940-1944 | 1.1(1.01, 1.2)   | 1.11(0.93, 1.32) | 0.65(0.57, 0.73) | 1.18(1.12, 1.24) | 0.47(0.42, 0.52)    |
| 1945-1949 | 0.97(0.9, 1.05)  | 1.07(0.93, 1.22) | 0.81(0.74, 0.89) | 1.11(1.06, 1.16) | 0.68(0.62, 0.74)    |
| 1950-1954 | 1.00             | 1.00             | 1.00             | 1.00             | 1.00                |
| 1955-1959 | 1.04(0.97, 1.12) | 0.95(0.84, 1.07) | 1.2(1.12, 1.3)   | 0.87(0.84, 0.91) | 1.47(1.37, 1.58)    |
| 1960-1964 | 0.98(0.91, 1.05) | 0.99(0.87, 1.13) | 1.4(1.29, 1.53)  | 0.7(0.67, 0.73)  | 2.09(1.93, 2.27)    |
| 1965-1969 | 0.95(0.87, 1.03) | 1.27(1.1, 1.46)  | 1.61(1.45, 1.78) | 0.49(0.46, 0.51) | 2.82(2.55, 3.11)    |
| 1970-1974 | 0.92(0.83, 1.02) | 1.84(1.57, 2.14) | 1.55(1.37, 1.77) | 0.34(0.32, 0.36) | 3.54(3.14, 3.99)    |
| 1975-1979 | 0.94(0.84, 1.06) | 1.96(1.61, 2.38) | 1.37(1.17, 1.6)  | 0.24(0.23, 0.26) | 4.02(3.47, 4.65)    |
| 1980-1984 | 0.87(0.74, 1.02) | 1.78(1.3, 2.43)  | 1.13(0.92, 1.38) | 0.19(0.18, 0.21) | 4.74(3.94, 5.71)    |
| 1985-1989 | 0.92(0.69, 1.22) | 1.8(0.88, 3.67)  | 1.51(1.14, 2)    | 0.17(0.15, 0.19) | 8.15(6.33, 10.47)   |
| 1990-1994 | 1.08(0.59, 1.97) | 1.3(0.23, 7.41)  | 3.33(2.19, 5.06) | 0.17(0.13, 0.22) | 22.16(15.39, 31.93) |

Appendix 4.6 Relative risk of each cohort compared with the reference (cohort 1955–1959) and the corresponding 95% CIs in HIV- positive Male

| Cohorts   | China            | Russia           | India            | Brazil           | South Africa       |
|-----------|------------------|------------------|------------------|------------------|--------------------|
| 1915-1919 | 1.29(0.96, 1.72) | 2(0.34, 11.63)   | 0.42(0.06, 3.06) | 1.19(0.93, 1.53) | 0.05(0.01, 0.2)    |
| 1920-1924 | 1.19(0.99, 1.44) | 1.55(0.62, 3.88) | 0.32(0.15, 0.67) | 1.45(1.26, 1.67) | 0.09(0.05, 0.14)   |
| 1925-1929 | 1.01(0.87, 1.17) | 1.53(0.86, 2.73) | 0.33(0.22, 0.5)  | 1.45(1.31, 1.61) | 0.13(0.1, 0.17)    |
| 1930-1934 | 0.94(0.83, 1.08) | 1.37(0.95, 1.98) | 0.34(0.25, 0.45) | 1.35(1.25, 1.46) | 0.18(0.15, 0.23)   |
| 1935-1939 | 0.99(0.89, 1.1)  | 1.27(0.95, 1.69) | 0.48(0.4, 0.57)  | 1.32(1.24, 1.4)  | 0.26(0.23, 0.3)    |
| 1940-1944 | 1.06(0.97, 1.15) | 1.2(1.02, 1.41)  | 0.67(0.6, 0.76)  | 1.23(1.17, 1.29) | 0.39(0.35, 0.44)   |
| 1945-1949 | 0.96(0.88, 1.03) | 1.11(0.98, 1.26) | 0.83(0.76, 0.91) | 1.14(1.09, 1.19) | 0.62(0.57, 0.67)   |
| 1950-1954 | 1.00             | 1.00             | 1.00             | 1.00             | 1.00               |
| 1955-1959 | 1.06(0.99, 1.14) | 0.92(0.82, 1.03) | 1.15(1.07, 1.24) | 0.84(0.81, 0.87) | 1.49(1.39, 1.6)    |
| 1960-1964 | 1.03(0.96, 1.11) | 0.92(0.82, 1.05) | 1.29(1.18, 1.41) | 0.63(0.6, 0.65)  | 2(1.84, 2.17)      |
| 1965-1969 | 1.06(0.97, 1.15) | 1.17(1.02, 1.33) | 1.4(1.26, 1.56)  | 0.41(0.39, 0.42) | 2.49(2.25, 2.77)   |
| 1970-1974 | 1.05(0.95, 1.16) | 1.66(1.43, 1.93) | 1.26(1.1, 1.43)  | 0.27(0.26, 0.29) | 3.03(2.66, 3.46)   |
| 1975-1979 | 1.06(0.94, 1.19) | 1.66(1.37, 2.02) | 1.01(0.85, 1.19) | 0.19(0.18, 0.21) | 3.72(3.15, 4.4)    |
| 1980-1984 | 0.99(0.84, 1.17) | 1.39(0.99, 1.93) | 0.79(0.63, 0.99) | 0.16(0.14, 0.17) | 4.84(3.83, 6.11)   |
| 1985-1989 | 1.07(0.79, 1.46) | 1.3(0.56, 3.04)  | 1.18(0.85, 1.65) | 0.13(0.11, 0.15) | 13.84(9.79, 19.55) |
| 1990-1994 | 1.27(0.65, 2.49) | 0.94(0.11, 7.78) | 2.97(1.8, 4.91)  | 0.11(0.08, 0.15) | 54.4(34.47, 85.86) |

Appendix 4.7 Relative risk of each cohort compared with the reference (cohort 1955–1959) and the corresponding 95% CIs in HIV- positive Female

| Cohorts   | China            | Russia           | India            | Brazil           | South Africa        |
|-----------|------------------|------------------|------------------|------------------|---------------------|
| 1915-1919 | 1.83(1.34, 2.5)  | 1.51(0.61, 3.73) | 0.34(0.04, 3.03) | 1.07(0.74, 1.55) | 0.08(0.02, 0.43)    |
| 1920-1924 | 1.65(1.35, 2.02) | 1.34(0.76, 2.35) | 0.22(0.09, 0.53) | 1.02(0.81, 1.28) | 0.13(0.07, 0.23)    |
| 1925-1929 | 1.41(1.21, 1.65) | 1.24(0.82, 1.86) | 0.24(0.15, 0.38) | 1.08(0.92, 1.26) | 0.2(0.14, 0.28)     |
| 1930-1934 | 1.3(1.14, 1.49)  | 0.98(0.71, 1.36) | 0.24(0.17, 0.33) | 1.03(0.9, 1.17)  | 0.28(0.22, 0.36)    |
| 1935-1939 | 1.25(1.11, 1.4)  | 0.83(0.61, 1.11) | 0.38(0.3, 0.48)  | 1.03(0.93, 1.14) | 0.4(0.33, 0.48)     |
| 1940-1944 | 1.22(1.11, 1.34) | 0.79(0.65, 0.96) | 0.6(0.51, 0.7)   | 1.02(0.94, 1.11) | 0.55(0.48, 0.64)    |
| 1945-1949 | 1.03(0.95, 1.12) | 0.86(0.73, 1.01) | 0.78(0.69, 0.87) | 1.03(0.96, 1.1)  | 0.74(0.66, 0.83)    |
| 1950-1954 | 1.00             | 1.00             | 1.00             | 1.00             | 1.00                |
| 1955-1959 | 1(0.93, 1.08)    | 1.18(1.03, 1.35) | 1.31(1.19, 1.44) | 0.98(0.92, 1.04) | 1.44(1.3, 1.59)     |
| 1960-1964 | 0.85(0.79, 0.92) | 1.47(1.28, 1.69) | 1.64(1.47, 1.83) | 0.93(0.87, 0.99) | 2.14(1.92, 2.39)    |
| 1965-1969 | 0.72(0.66, 0.79) | 2(1.73, 2.3)     | 2.03(1.77, 2.32) | 0.75(0.7, 0.8)   | 3.02(2.65, 3.44)    |
| 1970-1974 | 0.68(0.61, 0.76) | 2.99(2.57, 3.49) | 2.13(1.82, 2.51) | 0.58(0.53, 0.62) | 3.86(3.32, 4.5)     |
| 1975-1979 | 0.74(0.65, 0.83) | 3.59(3, 4.29)    | 2.04(1.68, 2.47) | 0.41(0.37, 0.45) | 4.27(3.56, 5.12)    |
| 1980-1984 | 0.66(0.56, 0.78) | 3.57(2.79, 4.57) | 1.73(1.35, 2.2)  | 0.32(0.28, 0.37) | 5.01(4.01, 6.26)    |
| 1985-1989 | 0.67(0.51, 0.89) | 3.62(2.28, 5.75) | 2.15(1.57, 2.96) | 0.31(0.25, 0.37) | 7.78(5.79, 10.44)   |
| 1990-1994 | 0.8(0.46, 1.39)  | 2.58(0.88, 7.54) | 4.38(2.78, 6.91) | 0.37(0.27, 0.52) | 16.56(10.51, 26.08) |

## Checklist of information that should be included in new reports of global health estimates

| Item #                                                                                                | Checklist item                                                                                                                                                                                                                                                                                                                                                                            | Reported on page # |
|-------------------------------------------------------------------------------------------------------|-------------------------------------------------------------------------------------------------------------------------------------------------------------------------------------------------------------------------------------------------------------------------------------------------------------------------------------------------------------------------------------------|--------------------|
| <b>Objectives and funding</b>                                                                         |                                                                                                                                                                                                                                                                                                                                                                                           |                    |
| 1                                                                                                     | Define the indicator(s), populations (including age, sex, and geographic entities), and time period(s) for which estimates were made.                                                                                                                                                                                                                                                     | 3-4                |
| 2                                                                                                     | List the funding sources for the work.                                                                                                                                                                                                                                                                                                                                                    | 4                  |
| <b>Data Inputs</b>                                                                                    |                                                                                                                                                                                                                                                                                                                                                                                           |                    |
| <i>For all data inputs from multiple sources that are synthesized as part of the study:</i>           |                                                                                                                                                                                                                                                                                                                                                                                           |                    |
| 3                                                                                                     | Describe how the data were identified and how the data were accessed.                                                                                                                                                                                                                                                                                                                     | 3                  |
| 4                                                                                                     | Specify the inclusion and exclusion criteria. Identify all ad-hoc exclusions.                                                                                                                                                                                                                                                                                                             | 3                  |
| 5                                                                                                     | Provide information on all included data sources and their main characteristics. For each data source used, report reference information or contact name/institution, population represented, data collection method, year(s) of data collection, sex and age range, diagnostic criteria or measurement method, and sample size, as relevant.                                             | 3                  |
| 6                                                                                                     | Identify and describe any categories of input data that have potentially important biases (e.g., based on characteristics listed in item 5).                                                                                                                                                                                                                                              | 3                  |
| <i>For data inputs that contribute to the analysis but were not synthesized as part of the study:</i> |                                                                                                                                                                                                                                                                                                                                                                                           |                    |
| 7                                                                                                     | Describe and give sources for any other data inputs.                                                                                                                                                                                                                                                                                                                                      | N/A                |
| <i>For all data inputs:</i>                                                                           |                                                                                                                                                                                                                                                                                                                                                                                           |                    |
| 8                                                                                                     | Provide all data inputs in a file format from which data can be efficiently extracted (e.g., a spreadsheet rather than a PDF), including all relevant meta-data listed in item 5. For any data inputs that cannot be shared because of ethical or legal reasons, such as third-party ownership, provide a contact name or the name of the institution that retains the right to the data. | 12                 |
| <b>Data analysis</b>                                                                                  |                                                                                                                                                                                                                                                                                                                                                                                           |                    |
| 9                                                                                                     | Provide a conceptual overview of the data analysis method. A diagram may be helpful.                                                                                                                                                                                                                                                                                                      | 3-4                |
| 10                                                                                                    | Provide a detailed description of all steps of the analysis, including mathematical formulae. This description should cover, as relevant, data cleaning, data pre-processing, data adjustments and weighting of data sources, and mathematical or statistical model(s).                                                                                                                   | 4                  |
| 11                                                                                                    | Describe how candidate models were evaluated and how the final model(s) were selected.                                                                                                                                                                                                                                                                                                    | N/A                |
| 12                                                                                                    | Provide the results of an evaluation of model performance, if done, as well as the results of any relevant sensitivity analysis.                                                                                                                                                                                                                                                          | N/A                |
| 13                                                                                                    | Describe methods for calculating uncertainty of the estimates. State which sources of uncertainty were, and were not, accounted for in the uncertainty analysis.                                                                                                                                                                                                                          | 4                  |
| 14                                                                                                    | State how analytic or statistical source code used to generate estimates can be accessed.                                                                                                                                                                                                                                                                                                 | 4                  |
| <b>Results and Discussion</b>                                                                         |                                                                                                                                                                                                                                                                                                                                                                                           |                    |
| 15                                                                                                    | Provide published estimates in a file format from which data can be efficiently extracted.                                                                                                                                                                                                                                                                                                | 12                 |
| 16                                                                                                    | Report a quantitative measure of the uncertainty of the estimates (e.g. uncertainty intervals).                                                                                                                                                                                                                                                                                           | 5-6                |
| 17                                                                                                    | Interpret results in light of existing evidence. If updating a previous set of estimates, describe the reasons for changes in estimates.                                                                                                                                                                                                                                                  | 7-11               |
| 18                                                                                                    | Discuss limitations of the estimates. Include a discussion of any modelling assumptions or data limitations that affect interpretation of the estimates.                                                                                                                                                                                                                                  | 11                 |

*This checklist should be used in conjunction with the GATHER statement and Explanation and Elaboration document, found on [gather-statement.org](http://gather-statement.org)*

## Authors' Contributions

### Providing data or critical feedback on data sources

Sameer Dhingra, Mahaveer Golechha, Yangmu Huang, Kewal Krishan, Hmwe Hmwe Kyu, Guangqi Liu, Francisco Rogerlândio Martins-Melo, Sumaira Mubarik, Christopher J L Murray, Osaretin Christabel Okonji, Mahesh P A, Priya Rathi, Pugazhenthana Thangaraju, Mikhail Sergeevich Zastrozhin, and Zhiyong Zou.

### Developing methods or computational machinery

Yangmu Huang, Guangqi Liu, Christopher J L Murray, Mikhail Sergeevich Zastrozhin, and Zhiyong Zou.

### Providing critical feedback on methods or results

Saurav Basu, Uzma Iqbal Belgaumi, Arkadeep Dhali, Sameer Dhingra, Ginenus Fekadu, Mahaveer Golechha, Simon I Hay, Yangmu Huang, Nitin Joseph, Kewal Krishan, Hmwe Hmwe Kyu, Guangqi Liu, Francisco Rogerlândio Martins-Melo, Sumaira Mubarik, Christopher J L Murray, Osaretin Christabel Okonji, Mahesh P A, Priya Rathi, Ranjitha S Shetty, Paramdeep Singh, Surjit Singh, Pugazhenthana Thangaraju, Ziyue Wang, Mikhail Sergeevich Zastrozhin, and Zhiyong Zou.

### Drafting the work or revising is critically for important intellectual content

Saurav Basu, Uzma Iqbal Belgaumi, Arkadeep Dhali, Sameer Dhingra, Ginenus Fekadu, Simon I Hay, Yangmu Huang, Nitin Joseph, Kewal Krishan, Hmwe Hmwe Kyu, Guangqi Liu, Francisco Rogerlândio Martins-Melo, Christopher J L Murray, Osaretin Christabel Okonji, Mahesh P A, Paramdeep Singh, Pugazhenthana Thangaraju, Ziyue Wang, Mikhail Sergeevich Zastrozhin, and Zhiyong Zou.

### Managing the estimation or publications process

Simon I Hay, Yangmu Huang, Guangqi Liu, Christopher J L Murray, Mahesh P A, Mikhail Sergeevich Zastrozhin, and Zhiyong Zou.
